1 **Intergenerational pathogen-induced diapause in *C. elegans* is modulated by *mir-243*.**

2

3 Carolina Gabaldon,<sup>1,2\*</sup> Marcela Legüe,<sup>1,2\*</sup> M. Fernanda Palominos,<sup>1,3\*</sup> Lidia Verdugo,<sup>1</sup> Florence  
4 Gutzwiller,<sup>1</sup> Andrea Calixto<sup>1,2</sup> #.

5

6 <sup>1</sup>Centro Interdisciplinario de Neurociencia de Valparaíso, Valparaíso, Chile

7 <sup>2</sup>Programa de Doctorado Genómica Integrativa, Universidad Mayor, Santiago de Chile, Chile.

8 <sup>3</sup>Programa de Doctorado en Ciencias, mención Neurociencia, Universidad de Valparaíso, Valparaíso,  
9 Chile.

10

11 Running head: *mir-243* modulates defenses against pathogens.

12 \**contributed equally to this work. Author order was determined alphabetically.*

13

14 # Correspondence to Andrea Calixto [tigonas@gmail.com](mailto:tigonas@gmail.com); [andrea.calixto@cinv.cl](mailto:andrea.calixto@cinv.cl)

15

16

## 17 Abstract

18 The interaction and communication between bacteria and their hosts modulate many aspects of animal  
19 physiology and behavior. Dauer entry as a response to chronic exposure to pathogenic bacteria in  
20 *Caenorhabditis elegans* is an example of a dramatic survival response. This response is dependent on  
21 the RNAi machinery, suggesting the involvement of sRNAs as effectors. Interestingly, dauer formation  
22 occurs after two generations of interaction with two unrelated moderately pathogenic bacteria.  
23 Therefore, we sought to discover the identity of *C. elegans* RNAs involved in pathogen-induced  
24 diapause. Using transcriptomics and differential expression analysis of coding and long and small non-  
25 coding RNAs, we found that *mir-243-3p* is the only transcript continuously upregulated in animals  
26 exposed to both, *P. aeruginosa* or *S. enterica* for two generations. Phenotypic analysis of mutants  
27 showed that *mir-243* is required for dauer formation under pathogenesis but not under starvation.  
28 Moreover, DAF-16, a master regulator of defensive responses in the animal and required for dauer  
29 formation was found to be necessary for *mir-243* expression. This work highlights the role of a small  
30 non-coding RNA in the intergenerational defensive response against pathogenic bacteria and inter-  
31 kingdom communication.

32

## 33 Importance

34 Persistent infection of the bacterivore nematode *C. elegans* with bacteria such as *P. aeruginosa* and *S.*  
35 *enterica* makes the worm diapause or hibernate. By doing this, the worm closes its mouth avoiding  
36 infection. This response takes two generations to be implemented. In this work, we looked for genes  
37 expressed upon infection that could mediate the worm diapause triggered by pathogens. We identify  
38 *mir-243-3p* as the only transcript commonly upregulated when animals feed on *P. aeruginosa* and *S.*  
39 *enterica* for two consecutive generations. Moreover, we demonstrate that *mir-243-3p* is required for  
40 pathogen-induced dauer formation, a new function that has not been previously described for this  
41 miRNA. We also find that the transcriptional activators DAF-16, PQM-1 and CRH-2 are necessary for  
42 the expression of *mir-243* under pathogenesis. Here we establish a relationship between a small RNA  
43 and a developmental change that ensures the survival of a percentage of the progeny.

44

## 45 Introduction

46 *C. elegans* has a close evolutionary relationship with bacteria (1) as it has naturally evolved  
47 exposed to microbes from the soil that can either be their food source or a threat (2, 3, 4). In laboratory  
48 settings *C. elegans* has been fed for decades on the standardized bacteria *E. coli* OP50 and just in  
49 recent times our understanding of this nematode-bacteria relationship has evolved from a simple static  
50 organism/substrate pair to a dynamic model in which host and microbe's performance changes  
51 throughout their association (5). Moreover, their ability to recognize and defend themselves from  
52 potential pathogens has likely been shaped by its continuous encounters with different types of  
53 bacteria, and thus when confronted with infectious microbes, *C. elegans* can avoid them by displaying  
54 complex behavioral, endocrine and immune responses (6, 7). The worm response is triggered by  
55 specific molecules secreted by bacteria such as toxic pigments from *P. aeruginosa* PA14 (8); cyanide  
56 from *P. aeruginosa* PAO1 (9); and serrawettin W2, produced by *S. marcescens* (10); but mediated by  
57 ASJ and ASI neurons through the activation of the DAF-7/TGF- $\beta$  pathway (7) in concert with neuro-  
58 peptidergic control of innate immunity (11) to finally modify their olfactory preferences (6). When  
59 avoidance is not possible and worms are exposed to highly pathogenic bacteria they die within 24  
60 hours (12). In contrast, when confronted with mild pathogenic bacteria for two or more generations, a  
61 percentage of the population enters diapause forming the dauer larvae, an alternative stress-resistant

62 larval stage that does not feed, thus is able to properly avoid pathogen infection (13). As pathogen-  
63 induced dauer formation (PIDF) depends on the RNA interference (RNAi) machinery (13) we propose  
64 that for its initiation PIDF requires the expression of a specific set of small RNAs (sRNAs), and at the  
65 long-term, the maintenance of sRNAs expression across more than one developmental cycle. This  
66 accumulation of sRNAs could generate molecular footprints that will predispose the upcoming  
67 generations of worms to enter diapause thus ensuring the survival of a percentage of the total  
68 population. In this way, the sustained but dynamical communication between host and pathogen  
69 enables the worm's development and reproduction over consecutive generations (13).

70 The molecules signaling diapause entry in the second generation after pathogen exposure are unknown.  
71 This work focuses on the discovery of sRNAs involved in the response of *C. elegans* to chronic  
72 pathogenic infection that leads to defensive dauer formation. Here we show that *mir-243-3p* is  
73 overexpressed in animals exposed to two unrelated pathogens and is needed to mount intergenerational  
74 pathogen-induced diapause formation. We also show that transcription factors DAF-16, PQM-1, and  
75 CRH-2 are required for the expression of the mature form of *mir-243*. Furthermore, PQM-1 and CRH-  
76 2 are also needed for dauer formation under pathogenesis. This work reveals an intergenerational role  
77 for *mir-243* in the defense against pathogens and highlights the importance of small RNAs as  
78 mediators of long-term survival strategies.

79

## 80 **Results**

### 81 **Global gene expression changes in intergenerational chronic exposure to pathogens**

82 Developmental and behavioral plasticity likely emerges from broad, complex gene expression changes  
83 at different molecular levels. To reveal RNA profiles underlying the intergenerational diapause entry  
84 (13) we performed a transcriptomic analysis of two generations of synchronized *C. elegans* in the L2  
85 stage. Animals were grown on the two diapause-inducing bacteria *P. aeruginosa* PAO1 and *S. enterica*  
86 serovar Typhimurium MST1; and on *E. coli* OP50, which does not trigger dauer formation. We aimed  
87 at finding transcriptomic changes elicited by both pathogens in the two generations that could explain  
88 PIDF. Sequencing was performed on both mRNA and small RNA libraries generated by separate  
89 methods (see Materials and Methods). In this first result, we will address polyA+ RNAs while sRNAs  
90 will be addressed in the next section. To detect mRNAs and other polyadenylated transcripts, mRNA  
91 libraries were polyA-selected (polyA+). We performed differential gene expression analysis of animals  
92 feeding on pathogenic bacteria, using non-pathogenic *E. coli* OP50 as a reference. We considered  
93 differentially expressed (DE) those genes with a log2 fold change of >1, padj <0.05 by DeSeq and p  
94 <0.05 by EdgeR (Dataset 1; Table S1 and 2). Differentially expressed polyA+ RNAs included coding  
95 and non-coding transcripts (**Figure 1A-D**). Among non-coding transcripts, we found piRNAs, 7k  
96 ncRNA, pseudogenes, tRNAs, lincRNAs, asRNAs, snoRNA, snRNA, and rRNAs (**Fig. 1E and F**).  
97 Surprisingly, transcriptional changes in coding and non-coding polyA+ RNAs were much larger in  
98 abundance and diversity in the first (F1) than in the second generation (F2) of animals fed with either  
99 pathogen (**Fig. 1A-F**).

100 PolyA+ RNAs were overexpressed or repressed in a generation and/or pathogen-specific manner  
101 (**Table S3**) and did not share upregulated coding or non-coding polyA+ sequences that were common  
102 to both pathogens and both generations (**Fig. 1G**). Notwithstanding, we found coincidences for the  
103 repression of three genes: *acdH-1*, *hphd-1*, and F54D5.12 (**Fig. 1H**), in both pathogens and across the  
104 two generations. All coding genes differentially expressed in the F2 were also up or downregulated in  
105 the F1, with no new genes of this kind turned on or off selectively in the F2 (**Table S3**).

106 To distinguish between changes caused by food switch from *E. coli* to other bacteria from changes  
107 induced by long-lasting pathogenic exposure, we compared the expression profiles of animals feeding  
108 on *P. aeruginosa* and *S. enterica* in the F1, to those reported for *Comamonas aquatica*, a nourishing  
109 food for *C. elegans* (14). Upregulated coding genes were only present between pathogens (“pathogen-  
110 exclusive” in **Fig. 2A**), but repressed genes were found in worms exposed to the three bacteria (**Fig.**  
111 **2B**). These 16 downregulated genes were all enriched in gene ontology (GO) terms related to metabolic  
112 processes. This reveals a common “food switch factor” caused by changing diet from *E. coli* to other  
113 food sources despite their pathogenic potential. We then compared the expression changes produced in  
114 the second generation (F2) of worms exposed to *P. aeruginosa* and *S. enterica* to those produced by  
115 worm’s first encounter with *C. aquatica* (14). Surprisingly, *acdh-1*, *hphd-1*, and F54D5.12 (**Fig. 1H**)  
116 remained downregulated in both pathogens and *C. aquatica* (**Fig. 2C**). Therefore, when animals are  
117 switched from *E. coli* to pathogens, a mixed transcriptional response involving regulation of metabolic  
118 and immune response is triggered. However, in the long term, the response is specified and reduced to  
119 a small subset of downregulated genes that are common between pathogens and nutritious food (**Fig.**  
120 **S1C**), showing that the transcriptional response prior to dauer formation in the F2 reflects a defensive  
121 response to pathogenic conditions intertwined with an ongoing metabolic transformation.

122 In addition, to relate transcriptional changes exclusively induced by pathogen exposure to processes of  
123 physiological relevance for PIDF, we examined enriched GO terms in up and downregulated genes, in  
124 each generation and each bacterium (**Fig. S1A-B** and **D-E**). Upregulated genes in the F1 on both  
125 pathogens shared enrichment in structural components of the cuticle (**Fig. S1A-C**). *S. enterica* could  
126 only be tested in the F1 because there was only one differentially expressed gene in the F2. In *P.*  
127 *aeruginosa*, both generations displayed GO enrichment, with the F2 specifically enriched in genes  
128 involved in defense against biotic stress (**Fig. S1A** and **C**). The latter was significantly and specifically  
129 enriched in animals fed on *P. aeruginosa* for two generations (**Fig. S1D-F**). Taken together, these  
130 results further prompt the idea that in the long-term, *C. elegans* can adapt to the pathogenic encounter  
131 overcoming the general response to diet change and keep specific biological changes that may aid their  
132 survival, such as cuticle, metabolism, defense and dauer reprogramming.

133 Global analysis of mRNA overexpression shows that changes are dissimilar for animals feeding on *S.*  
134 *enterica* serovar Typhimurium MST1 and *P. aeruginosa* PAO1 throughout the two generations. Since  
135 worms can enter diapause in both *P. aeruginosa* and *S. enterica* the decision that gives rise to PIDF is  
136 not solely reliant on changes in mRNA expression, but also on other levels of regulation. To further  
137 understand its underlying molecular causes, we analyzed changes in the sRNAs repertoire in both  
138 bacteria and generations.

139

## 140 **sRNA expression in two generations of *C. elegans* exposed to bacterial pathogens**

141 Small RNAs (sRNAs) are broad regulators of gene expression (15, 16, 17) and key candidates  
142 to modulate inter and transgenerational environmental adaptation (13, 18, 19). We aimed to unbiasedly  
143 identify known and novel sRNAs expressed when animals are fed on each bacterium through two  
144 consecutive generations. For that, we defined candidate sRNAs loci based on transcriptional peaks  
145 coordinates or TPs (defined in Materials and Methods). These TPs were used for the downstream  
146 RNAseq analysis. Then we compared those genomic loci with annotated features to classify them as  
147 known (matching an annotated sRNA), novel (located in intergenic regions), or partially novel  
148 (unannotated but overlapping or nested within a feature, see **Fig. 3A** and **Dataset 2**). Considering all  
149 differentially expressed genes in either pathogen 6.2% were known features, 77.8% were partially  
150 novel sequences, and 16% were novel TPs (**Fig. 3B**). Known differentially expressed TPs in pathogen-  
151 fed worms include pre-miRNAs and mature miRNAs. Partially novel TPs were nested in intronic or

152 exonic segments of coding genes, or overlapping with 5' and 3'UTR ends. The TPs nested in non-  
153 coding transcripts were found in rRNAs and 21-ur RNAs. We also found pseudogenic transcripts,  
154 tRNAs and novel TPs within intergenic regions (**Fig. 3C** and **Table S4** and **5**). Interestingly, from all  
155 expressed TPs, *mir-243-3p* along with another 11 TPs nested within the *rrn-3.1* ribosomal gene were  
156 upregulated in both generations of worms fed on *P. aeruginosa* PAO1 and *S. enterica* MST1 (**Fig. 3D**  
157 and **Table S6**). In contrast, the *premir-70* and another 9 novel TPs were downregulated similarly in  
158 both, bacteria and generations (**Fig. 3E** and **Table S6**, shared all conditions). Despite these, most TPs  
159 were specifically DE in response to MST1 or PAO1, or to both pathogens but in only one generation.  
160 For example, *mir-51* was exclusively upregulated in the F1 of animals feeding on PAO1 (**Table S6**,  
161 generation-specific), but *21ur-6043* was upregulated in both generations on PAO1 (**Table S6**,  
162 bacterium-specific). Interestingly, 4 miRNAs (*mir-1*, *mir-48*, *mir-256*, *mir-257*) were downregulated  
163 only in the second generation on *P. aeruginosa* PAO1 (**Table S4**). One of them, *mir-48*, a *let-7Fam*  
164 member is known to be repressed on the more virulent *P. aeruginosa* strain PA14 (20). These results  
165 show that sRNA expression in the context of long-term pathogen exposure is mostly specific to one  
166 generation or one pathogen. However, *mir-243-3p* is overexpressed across conditions suggesting it may  
167 function as a common effector in PIDF. As the response to PAO1 in the F2 was the largest in terms of  
168 numbers of TPs both up and downregulated (**Fig. 3F**) the following experiments were performed using  
169 *P. aeruginosa* PAO1.

#### 170 ***mir-243* is necessary for diapause formation under pathogenesis**

171 To test the requirement of *mir-243* on PIDF we first quantified by RT-PCR the relative amounts  
172 of mature *mir-243-3p* in each generation of animals feeding on *P. aeruginosa* PAO1 compared to those  
173 feeding on *E. coli* OP50. RNA was extracted from L2 worms fed on *P. aeruginosa* and *E. coli* in the F1  
174 and F2, as was done for the transcriptomic analysis. We found that *mir-243-3p* appeared upregulated  
175 by 4-fold in the second generation of worms feeding on *P. aeruginosa* PAO1 and 1-fold change in the  
176 F1, and as expected, *mir-243* (*n4759*) mutants were unable to express mature *mir-243* (**Fig. 4A**). To  
177 further explore the role of *mir-243* in PIDF we tested whether mutant animals for *mir-243* (*n4759*)  
178 were able to form dauers on *P. aeruginosa* PAO1 in the second generation. We also tested as reference  
179 animals with a deletion in *mir-235* (*n4504*), a microRNA involved in nutritional-related L1 diapause  
180 (21), which was not DE under pathogenesis. *mir-243* and *mir-235* mutants were fed on *P. aeruginosa*  
181 PAO1 for two generations. The population growth and appearance of dauers was quantified in the F2  
182 and compared to wild type animals. Growth on *P. aeruginosa* PAO1 was not affected by either  
183 mutation (**Fig. 4B**), but just *mir-243* mutants were found to form significantly less dauers than wild  
184 type or *mir-235* animals when fed on *P. aeruginosa* PAO1 (**Fig. 4C**). Therefore, these mutations do not  
185 increase susceptibility to pathogens, as revealed by growth, but since none of them were deficient in  
186 dauer formation under starvation (**Fig. 4D**), this result importantly suggests that *mir-243* has a specific  
187 role in dauer formation under pathogenesis.

188 We have shown that *mir-243* is required for PIDF and thus we explored its potential molecular  
189 targets. Interestingly, *mir-243* is known to activate the exo-RNAi pathway by binding RDE-1,  
190 triggering the production of secondary siRNAs. the Y47H10A.5 mRNA has been revealed repressed by  
191 this mechanism (20). Even though *mir-243* is upregulated in all PIDF conditions, Y47H10A.5 is not  
192 differentially expressed in our data. Therefore, we tested the hypothesis that some downregulated  
193 mRNA under pathogenesis could be *mir-243* targets. Using the IntaRNA tool version 2.0 (22), we  
194 computed the expected RNA-RNA interactions among *mir-243* and our downregulated mRNAs. We  
195 found that *mir-243* has the potential for binding 26 of our 136-downregulated genes with high  
196 complementarity (seed  $\geq 12$ ) and strong negative free energy (NFE). Even though Y47H10A.5, a  
197 validated *mir-243-3p* target, is not differentially expressed in our data, we computed the interaction

198 with the same parameters and found that Y47H10A.5 has lower NFE and shorter seed than our  
199 candidate targets (**Table S7**).

200

## 201 **DAF-16 and other transcriptional activators regulate the expression of *mir-243* under** 202 **pathogenesis.**

203 To study whether the increase of mature *mir-243* in animals feeding on pathogens in the F2 could  
204 be a result of transcriptional activation we quantified the fluorescence of a strain expressing *gfp* under  
205 the *mir-243* promoter (VT1474). We measured *gfp* expression in L2 worms grown on pathogens for  
206 two generations and compared it with those grown on *E. coli* OP50. Animals feeding on pathogens  
207 overexpress *Pmir-243::gfp* compared to *E. coli* OP50 controls in both generations (**Fig. 5A**) suggesting  
208 that the exposure to pathogens activates the transcription of *mir-243* in concordance with our previous  
209 expression results (**Fig. 4A**). However, the mechanism behind *mir-243* transcriptional activation is  
210 unknown. A number of transcription factors (TF) promote the expression of their targets under stress  
211 and infection (23, 24, 25). It has been previously reported that *mir-243* and members of the *let-7* family  
212 are the miRNAs with the highest number of interactions to TF in the *C. elegans* genome (26). We  
213 specifically tested the role of three transcriptional regulators, DAF-16, PQM-1 and CRH-2 in *mir-243-3p*  
214 expression. The reasons for choosing them are explained below. In our paradigm, DAF-16/FOXO  
215 transcriptional activator localizes into the nucleus of animals exposed to *P. aeruginosa* PAO1 prior to  
216 diapause formation (13). PQM-1 resides in the nucleus regulating the expression of DAF-16-associated  
217 elements (DAE), avoiding dauer formation (27). Finally, we included CRH-2 because it is a direct target  
218 negatively regulated by the *let-7* family of microRNAs (28), which have been involved in the response  
219 to pathogenesis by the *P. aeruginosa* PA14 strain (20). In our experiments, *mir-48*, a *let-7* family miRNA,  
220 was downregulated in PAO1 in the F2 (**Table S4**). Under this logic, *crh-2* could be indirectly  
221 upregulated through *mir-48* downregulation. To give further ground to this selection, we tested whether  
222 *pqm-1* and *crh-2* promoters expression were higher in pathogens compared to non-pathogenic  
223 conditions. Using strains expressing *gfp* under promoters for *pqm-1* or *crh-2* we observed that the  
224 expression of both TFs is upregulated in animals fed with *P. aeruginosa* PAO1 for two generations  
225 compared to those fed on *E. coli* OP50 (**Fig. 5B and C**), as we have previously reported for DAF-16  
226 (13). To study whether these transcriptional regulators are necessary for the expression of *mir-243*  
227 under pathogenesis we extracted RNA from *daf-16(m27)*, *pqm-1(ok485)* and *crh-2(gk3293)* mutants  
228 in the F2 of worms fed with *P. aeruginosa* PAO1 and quantified the expression of *mir-243-3p* over  
229 wild type animals. All three mutants fed on *P. aeruginosa* for two generations completely lacked *mir-243-3p*  
230 expression (**Fig. 5D**). These results show that DAF-16, PQM-1 and CRH-2 transcription factors  
231 are needed for the expression of *mir-243-3p* in the second generation of animals exposed to pathogens.

232 Because *mir-243* loss affects the ability of animals to enter diapause under pathogenesis we  
233 further explore whether *crh-2* and *pqm-1* mutants also failed to form dauers under infection but formed  
234 normal amounts of dauers under starvation. Additionally, we tested whether these mutants were able to  
235 grow on *E. coli* and *P. aeruginosa* to wild type extents. As a control, we used a mutant of *elt-3*, a  
236 transcriptional activator with a broad expression in the animal. *daf-16* mutation causes animals to be  
237 unable to form dauers (29) and could not be tested. All TF mutants grew well on *E. coli* OP50 and to a  
238 similar extent as wild type animals on pathogenic bacteria (**Fig. 5E and F**). Interestingly, *crh-2* and  
239 *pqm-1* mutants were unable to enter diapause under pathogenesis after two generations (**Fig. 5G**) but  
240 formed normal amounts of dauers under starvation (**Fig. 5H**), while *elt-3* animals formed normal  
241 amounts under both, pathogenesis and starvation (**Fig. 5G and H**). Taken all together these results  
242 suggest that the role of *crh-2* and *pqm-1* TFs is specific to PIDF, and that an expression signaling

243 cascade including CRH-2, PQM-1 and DAF-16 upstream of *mir-243* expression is triggered by the  
244 long-term interaction of worms with the mild pathogen *P. aeruginosa* PAO1.

245

## 246 **Discussion**

247 Survival strategies to cope with environmental challenges rely on the genetic plasticity of  
248 organisms. In this work, we dissected the transcriptomic differences and similarities between worms  
249 feeding on three different bacteria. Two of them, *P. aeruginosa* PAO1 and *S. enterica* serovar  
250 Typhimurium MST1 elicit dauer entry as a defense strategy in the second generation (13). Differential  
251 gene expression analysis allowed us to identify *mir-243-3p* (the mature form of *mir-243*) as the only  
252 common upregulated sRNA in animals fed on these pathogens for two generations. Moreover, mutant  
253 animals for *mir-243* do not perform PIDF despite not being dauer defective under starvation. Finally,  
254 we tested the role of transcription factors DAF-16, PQM-1, and CRH-2 on *mir-243-3p* expression  
255 under pathogenesis. All three showed to be required for *mir-243* expression. Furthermore, in contrast to  
256 dauer defective DAF-16, the CRH-2 and PQM-1 transcription factors are specifically required for  
257 PIDF but not for dauer formation under starvation.

## 258 **Most transcriptional changes are unique to the encounter with each pathogen**

259 Gene expression is highly variable and dependent on environmental and physiological factors. *C.*  
260 *elegans* transcriptional profile is modified when animals are exposed to a new bacterial diet. These can  
261 be nutritious food, as *Comamonas aquatica* (14), non-pathogenic such as *Bacillus subtilis* (30), or  
262 pathogenic such as *Shigella flexneri* (31), *P. aeruginosa* PA14 and *Staphylococcus aureus* (32, 33).  
263 Temperature and diet changes trigger gene expression changes associated with defensive responses and  
264 metabolism (30). Environmental conditions can change the phenotype of subsequent generations (34,  
265 35, 36) suggesting that transcriptomic modifications can be inherited to the progeny. Accordingly, we  
266 speculate that the greater abundance in polyA+ transcripts on the F1 may reflect the response to a novel  
267 food source (being their first time not feeding on *E. coli* OP50, **Fig. 2**) and generalized stress and  
268 immune responses to pathogenesis. Therefore, the second generation of worms forced to fed on  
269 pathogens may have adapted to the pathogenic bacteria through inherited signals, narrowing the  
270 transcriptional changes to a more reduced transcriptional response [**Fig. S1**, (37)].

271 In this work, we discovered transcriptional changes that could explain the defensive decision to  
272 enter the dauer program as a response to pathogenesis (13). We notice that two different bacterial  
273 pathogens trigger the same phenotypic response in *C. elegans* but display few underlying  
274 transcriptomic similarities. We think that this could be an indicator of high functional specificity, result  
275 from a finely tuned long-term communication between bacteria and host. Clustering of genes by  
276 function (38) revealed large differences between animals fed on the two bacteria. In the wild, *C.*  
277 *elegans* is mostly found in the dauer stage, a strategy used to maximize the animal's survival by  
278 ensuring their dispersal to new food sources (39). Dauer entry, therefore, may be a convergent  
279 phenotypic outcome driven by a plethora of different stimulus and transcriptional regulatory pathways  
280 that allow the animal, under adverse circumstances, to ensure their own specie's survival.

281

## 282 **Small RNAs and pathogenesis**

283 Several works have explored the role of sRNA in infection (40, 41). Among them, microRNAs have  
284 been reported to be involved in the innate immune response of *C. elegans* against infection with  
285 bacterial pathogens, and even with eukaryotes such as the opportunist yeast *Candida albicans* (42). For  
286 example, *let-7* regulates the innate immune response by targeting intestinal SDZ-24 when fed on the

287 highly pathogenic *P. aeruginosa* PA14 (43). Moreover, other candidate targets of *let-7* and *let-7Fam* of  
288 microRNAs may include components of the PMK-1/p38 innate immune pathway (20). Likewise, *mir-*  
289 *67* mutants exhibited reduced pathogen avoidance behavior, apparently due to a dysregulation in *sax-7*  
290 targeting (44, 45). Others like *mir-70* and *mir-251/mir-252* mutants possess enhanced survival to *P.*  
291 *aeruginosa* PA14 infections, indicating that these miRNAs negatively regulate the immune response  
292 (46). Supporting this idea, we found that *mir-70* was systematically downregulated in animals feeding  
293 on both *P. aeruginosa* and *S. enterica*.

294 We describe here, that a single sRNA, *mir-243*, was the only upregulated transcriptional coincidence  
295 among animals fed on pathogens for two generations, and resulted to be required for pathogen-induced  
296 dauer formation. As mentioned, *mir-243* has an unusual association with RDE-1, an Argonaut protein  
297 known to be a siRNA acceptor (47), suggesting that *mir-243* may induce mRNA destabilization  
298 depending on the RNAi machinery. In accordance with that, we have previously shown that RDE-1,  
299 along with other RNAi effectors, are needed for the induction of dauer formation under pathogenesis  
300 (13). Predicted targets of *mir-243* within downregulated genes were almost perfectly complementary,  
301 suggesting that the mechanism by which *mir-243* induces silencing in the context of PIDF is could be  
302 also related to siRNA pathways as previously reported for other targets (47). Our approach allows us to  
303 narrow the spectra of possible *mir-243* targets in our experimental paradigm. *mir-243* can potentially  
304 target many genes for silencing. Côrrea et al. (47) reported 1835 upregulated genes in the *mir-243*  
305 mutant (microarray analysis comparing adult wild-type and mutant worms, fold change  $\geq 2$ ,  $p < 0.05$ ).  
306 We found 24 common genes between published upregulated genes in *mir-243* mutant (47) and  
307 downregulated genes in our datasets. Three of them (C14B1.3, *acs-2* and *mrp-2*) have high negative  
308 free energy (NFE) of interaction and high sequence complementarity ( $> \text{ or } = 12$  bp), becoming good  
309 candidates for future validation studies. The biological validation of predicted *mir-243* targets, as well  
310 as the role of downregulated microRNAs, such as *mir-70*, in PIDF will remain unresolved.  
311 Notwithstanding, our findings support the hypothesis that the response of *C. elegans* to different  
312 pathogens is accompanied by dynamic changes in the activity of miRNAs. In this work, we found that  
313 *mir-243* is involved in the response of *C. elegans* to infection with both pathogens, *P. aeruginosa*  
314 PAO1 and *S. enterica* MST1. Moreover, as the same miRNA is triggering similar effects on different  
315 pathogens, this may imply that changes in a single microRNA can induce similar phenotypic outputs,  
316 like dauer formation, but distinct molecular cascades to achieve it.

317

## 318 **Transcription factors involved in diapause formation as a defensive strategy**

319 A number of transcription factors activate the transcription of their targets under stress and  
320 infection. DAF-16 has been reported to regulate the expression of genes involved in defense when  
321 exposed to pathogenic bacteria such as *P. aeruginosa* PA14 (48), *S. enterica* strain 1344, *Yersinia*  
322 *pestis* strain KIM5, and *Staphylococcus aureus* MSSA476 (49). In the pathogen-induced dauer  
323 formation paradigm, DAF-16 localizes in the nucleus of animals exposed to *P. aeruginosa* PAO1 prior  
324 to diapause formation (13). In this work, we show that *mir-243* expression requires intact DAF-16.  
325 Furthermore, both, PQM-1, that affects the expression of DAF-16 in the nucleus (27), and CRH-2, that  
326 has been proposed to be regulated by *let-7* miRNA (28), are needed for *mir-243* expression under  
327 pathogenesis and their loss impairs PIDF. Although we did not carry out an exhaustive analysis of TFs  
328 related to the formation of dauer by pathogens, an extensive list of TFs that interact with *mir-243* and  
329 that could regulate it directly or indirectly, is available in the work of Martinez et al. (26). In this work  
330 we did not find differentially expressed genes whose mutations have been described before as  
331 conducting to abnormal dauer formation (*Daf*). This suggests at least two things, the expression of *Daf*



332 genes does not necessarily change at the level of mRNAs, or that the dauer program under pathogenesis  
333 is molecularly different from starvation-induced diapause (an abiotic stressor).

334 Dauer formation upon pathogenesis is likely a multistep process that involves the sensing, initiation  
335 and establishment of the pathogenic state. The transcriptional difference in polyA<sup>+</sup> genes of animals  
336 feeding on either pathogen during the F1 is much larger than in the F2 compared to their usual *E. coli*  
337 OP50 food. We speculate that the F1 response is pleiotropic and involves i) the first encounter with  
338 new bacteria and diet, and ii) the response to a pathogen. Importantly, the worm expression profile is  
339 mostly specific for each bacterium, coherent with the dissimilar nature of *P. aeruginosa* and *S. enterica*  
340 (50). This polyA<sup>+</sup> response is dramatically reduced in the F2, where differentially expressed genes are  
341 specifically involved in immune and defense response. Therefore, it is likely possible that in the second  
342 generation, specific transcriptional changes in polyA<sup>+</sup> coding and non-coding genes are accumulated  
343 sufficiently to exceed the threshold thus modulating developmental decisions to ensure survival. In this  
344 context, miRNAs and other sRNAs play key regulatory roles required for phenotypic and  
345 inter/transgenerational responses in *C. elegans*.

346 Dauer entry is a hard decision because it is metabolically and reproductively expensive for the animal.  
347 Therefore, we presumed that dauer-triggering signals should exceed a threshold that supports this  
348 choice. Time-dependent signaling molecules may be insufficient to reach a temporal threshold in the  
349 first generation of animals exposed to pathogens. For example, we know that dauer entry requires  
350 persistent intestinal colonization, which takes more than 48 hours feeding on *Pseudomonas aeruginosa*.  
351 Dauer entry is a complex process in which immune, metabolic, and stress signals are integrated at  
352 different levels of regulation.

353

## 354 **Materials and Methods**

### 355 ***C. elegans* and bacterial growth**

356 Wild type, mutant and transgenic *C. elegans* strains were grown at 20°C as previously described (51).  
357 All nematode strains were grown on *Escherichia coli* OP50-1 (resistant to streptomycin) before  
358 pathogen exposure. *S. enterica* serovar Typhimurium MST1 (ATCC 140828) and *P. aeruginosa* PAO1  
359 (ATCC 15692) were used for infection protocols. All bacteria were grown overnight on Luria-Bertani  
360 (LB) plates at 37°C from glycerol stocks. The next morning a large amount of the bacterial lawn is  
361 inoculated in LB broth and grown for 6 hours at 250 rpm and at 37°C. 3 mL of the resulting bacterial  
362 culture is seeded onto 90 mm NGM plates and allowed to dry for 36 hours before worms are placed on  
363 them.

### 364 ***C. elegans* strains**

365 We used the following strains of the *Caenorhabditis* Genetics Center (CGC): Wild type (N2),  
366 MT15454 [*mir-243(n4759)*], MT16060 [*mir-253(nDf64)*], DR27 [*daf-16(m27)*], VC3149 [*crh-2*  
367 (*gk3293*)], RB711 [*pqm-1(ok485)*], VC143 [*elt-3(gk121)*], and transgenic strains VT1474 [*Pmir-*  
368 *243::gfp(unc-119(ed3) III; maIs177)*], OP201 [*unc-119(tm4063) III*]; *wgls201(pqm-1::TY1::EGFP)*],  
369 BC13136 [*crh-2 C27D5.4a::gfp(dpy-5(e907); sEx13136)*], BC14266 [*dpy-5(e907); sEx14266*  
370 (*rCesF35E8.8::GFP + pCeH361*)]. Pertinence of strains with mutations in TF genes: There are many  
371 available strains with mutations in *daf-16*. We chose DR27 because it was the strains with the strongest  
372 Daf-d phenotype under starvation. *pqm-1(ok485)* and *crh-2(gk3293)* are the only strains available in  
373 the CGC for those genes.

### 374 **Hypochlorite treatment**

375 To synchronize *C. elegans* and/or to obtain pure embryos, we prepared a 5% hypochlorite solution  
376 containing 20 mL of 1 M NaOH, 30 mL NaClO and 50 mL H<sub>2</sub>O in 100 mL final volume. Plates with  
377 mostly gravid adults were washed with 1 mL of M9 (KH<sub>2</sub>PO<sub>4</sub> 3 g, Na<sub>2</sub>HPO<sub>4</sub> 6 g, NaCl 5 g, 1 M  
378 MgSO<sub>4</sub>, H<sub>2</sub>O up to 1 L) and transferred to an Eppendorf tube. The volume collected was centrifuged at  
379 394 x g. 1 mL of the hypochlorite solution was added to the pellet. After 5 minutes of vigorous vortex,  
380 the tube was centrifuged at 394 x g for 2 minutes. The pellet was washed with 1 mL of M9 solution and  
381 centrifuged at 394 x g and 2 minutes to discard the supernatant. The resulting pellet contains an embryo  
382 concentrate.

### 383 **Quantification of population and dauer larvae**

384 *Dauer formation on pathogens.* Entire worm populations on each plate were collected in 1 mL of M9.  
385 This initial stock was diluted 1:10 in M9. 10 µL of this 1:10 dilution was used to count the total  
386 population of worms under a Nikon SMZ745 stereomicroscope. To quantify the number of dauers in  
387 each population, the initial stock was diluted 1:10 in a 1% SDS solution and maintained in constant  
388 agitation for 20 minutes (52). To count the number of total animals and dauers, 10 µL of this last  
389 dilution was placed in a glass slide under the stereomicroscope. Each condition was scored 3 times  
390 (triplicated of one technical replica) and dauers were plotted as a percentage of the total populations of  
391 animals.

### 392 ***C. elegans* growth in pathogenic bacteria**

393 Five L4 (P0) wild type worms or mutants (grown in *E. coli* OP50) were picked and transferred to a 90  
394 mm diameter plate seeded with 3 mL of *P. aeruginosa* PAO1, *S. enterica* serovar Typhimurium MST1  
395 or *E. coli* OP50 control bacteria. In all cases, the bacterial lawn covered the plate. After 24 hours the F1  
396 embryos were obtained by hypochlorite treatment. All obtained embryos were placed on a new plate  
397 with *P. aeruginosa* PAO1, *S. enterica* serovar Typhimurium MST1 or *E. coli* OP50. Animals were  
398 allowed to grow for 24 hours until they reached the L2 stage. The total number of worms in the  
399 population and the percentage of dauer were quantified.

400 To obtain the F2, five L4 larvae were transferred from *E. coli* OP50 to a 90 mm diameter plate with 3  
401 mL of *P. aeruginosa* PAO1 or *S. enterica* serovar Typhimurium MST1. After eight days the total  
402 number of worms and dauer larvae were quantified. The number of bacteria seeded allowed animals to  
403 be well fed for the length of the experiment. In the case worms starved, we discarded that experiment.  
404 Each assay was performed in three independent experiments (technical replicates) generating a  
405 biological replica. A total of three biological replicates were considered for each analysis.

### 406 **Dual RNA Seq**

#### 407 *Sample preparation*

408 Wild type *C. elegans* were cultured on 60 mm diameter Petri dishes with NGM media seeded with 500  
409 µL of *E. coli* OP50 and maintained at 20°C. After three days, mixed stage animals were treated with  
410 bleaching solution and embryos were deposited in new dishes. 48 hours later, most individuals were in  
411 the L4 stage. Five L4 worms were transferred to 90 mm plates previously seeded with 3 mL of *E. coli*  
412 OP50, *S. enterica* serovar Typhimurium MST1 or *P. aeruginosa* PAO1. In all cases, the bacterial lawn  
413 covered the plate. Worms were allowed to grow at 20°C for 24 hours. After that time, all animals on  
414 the plate were subject to hypochlorite treatment. F1 embryos were collected in 1 mL of M9 and  
415 centrifuged at 394 x g. The embryos obtained were placed on a 90 mm new plate with 3 mL of  
416 bacteria. After 24 hours, animals were collected with M9 for total RNA extraction. Worms on other 3  
417 plates were allowed to grow for another 48 hours until the F1 was gravid. F2 progenies were collected  
418 in the same way as the F1 and placed on a separate plate with the same species of bacteria. Animals

419 were collected for RNA extraction 24 hours later. Each condition was performed in triplicates  
420 obtaining a total of 18 samples (F1 and F2 in *E. coli* OP50, *P. aeruginosa* PAO1 or *S. enterica* serovar  
421 Typhimurium MST1).

## 422 **RNA extraction**

423 *RNA extraction of colonizing bacteria and C. elegans.* Worms were washed off the plates with 1mL of  
424 M9, centrifuged at 394 x g for 2 min and resuspended at least 5 times with M9. RNA purification was  
425 performed using TRIzol (Life Technologies) following manufacturer's instructions. For RNA  
426 extraction, samples were mechanically lysed by vortexing with 4 mm steel beads for no more than five  
427 minutes. Each condition was performed in triplicates. Several biological replicas were mixed to reach  
428 the required concentration of 1 µg/µl of total RNA.

429 *mRNA library preparation and sequencing.* Total RNA was isolated from synchronized F1 and F2 *C.*  
430 *elegans* populations feeding on non-pathogenic *E. coli* OP50, and pathogens *P. aeruginosa* PAO1 and  
431 *S. enterica* serovar Typhimurium MST1 as explained above. After DNase I digestion with DNase I  
432 (Invitrogen™), RNA concentration was measured using Quant-iT™ RiboGreen® RNA Assay Kit  
433 (Life Technologies). The integrity of RNA was determined on the Agilent 2100 Bioanalyzer (Agilent  
434 Technologies). mRNA libraries were prepared with the IlluminaTruSeq™ RNA sample preparation kit  
435 (Illumina) according to the manufacturer's protocol. The quality and size distribution of the libraries  
436 were evaluated with the Agilent 2100 Bioanalyzer using a DNA 1000 chip (Agilent Technologies) and  
437 quantified using the KAPA Library Quantification Kit for Illumina Platforms (Kapa Biosystems) on  
438 the Step One Plus Real-Time PCR System (Applied Biosystems).

439 The *C. elegans* mRNAs libraries were sequenced using the HiSeq Illumina platform (BGI) with paired-  
440 end sequencing (2x 100 bp, BGI). *C. elegans* and bacterial small RNA were sequenced using the Mi-  
441 Seq Illumina platform at the Center for Genomics and Bioinformatics (CGB), Universidad Mayor.

442 *sRNA library construction and sequencing.* Samples were prepared and sequenced at CGB. Libraries  
443 were constructed with the TruSeq sRNA Sample Preparation Kit (Illumina), according to the  
444 manufacturer's instructions. For quality control, cDNA libraries were run on a high sensitivity DNA  
445 chip using the Agilent 2100 Bioanalyzer (Agilent Technologies), according to the manufacturer's  
446 instructions. An agarose gel library size selection was performed to recover RNAs shorter than 200  
447 nucleotides. The library was quantified using a high sensitivity DNA chip. The sRNA libraries were  
448 sequenced in an Illumina MiSeq sequencer using the MiSeq Reagent v2 50-cycle kit with single-end  
449 sequencing (1 x 36 bp). For each biological condition, three libraries were constructed from biological  
450 replicates.

## 451 **Bioinformatic analysis**

### 452 *mRNA transcriptomics of C. elegans*

453 *Data pre-processing and quality control.* Trimming was made with Trimmomatic v. 0.36 (53). Reads  
454 with a quality score (Phred score) less than 35 and read length less than 36 were removed.

455 *Mapping and read count.* Reads were aligned using Tophat (54) with default parameters. Reads were  
456 quantified using HTSeq count (55).

457 *Differential expression* was determined using EdgeR (56) and DeSeq (57). Differentially expressed  
458 genes were defined as those with adjusted p-value (padj) <0.05 by either method.

459 *Enrichment analysis: Gene Ontology (GO) analysis* was performed using the enrichment tool in  
460 wormbase (58).

## 461 *Small RNAs transcriptomics of C. elegans*

462 *Data pre-processing and quality control.* Quality visualization was made with FastQC  
463 (<http://www.bioinformatics.babraham.ac.uk/projects/fastqc>). Illumina small 3' adaptors were removed  
464 with Cutadapt version 1.13 (59). Reads with an average quality over four bases lower than 30, as well  
465 as reads shorter than 17 bp were discarded with trimmomatics (53).

466 *Mapping.* For each sample, the reads were aligned against the *C. elegans* genome PRJNA13758  
467 WS267 using bowtie2 version 2.2.6 (60). We chose a 17 bp seed length, which was the length of the  
468 shorter read. The seed interval was calculated as  $f(x) = 0 + 2.5 * \text{sqrt}(x)$ , where  $x$  is the read length  
469 (roughly two seeds per read as reads are 36 or smaller). For greater sensitivity, we set the number of  
470 mismatches allowed in a seed to 1. By default, 15% of ambiguous characters per read is allowed. A  
471 bam file was produced for each sample.

472 *Defining features and counting reads.* We developed a strategy to detect both known and unannotated  
473 transcripts from bacteria and *C. elegans*. For that, we chose to make a reference annotation based on  
474 observed expression peaks. Some reads overlap annotated genes, others show more than one peak in  
475 annotated regions, and many peaks are located in unannotated regions. We selected those genomic  
476 areas covered by mapped reads to define customized features, named transcriptional peaks (TPs)  
477 defined as a genomic area that shows a peak of expression (more than 10 per base) and that may  
478 correspond to direct transcription or fragments of a longer transcript. This was done by merging bam  
479 files from each sample using SAMTools version 0.1.19 (61). Afterward we only kept features between  
480 17 and 150 nucleotides with an average coverage of 10 or more reads by nucleotide. The features  
481 obtained for both strands were gathered and sorted to create a custom GFF file for further analysis.  
482 Next, we counted the reads against those custom GFF. For comparison with databases, we intersected  
483 TPs with reported annotations and classified them according to their genomic context.

484 *Comparison with annotated genes.* To see how TPs matched with annotated genes, we compared them  
485 to the Ensembl database, by intersecting the GTF file of *C. elegans* (PRJNA13758.WS267) with our  
486 custom GFF file, using BEDTools (62). Based on this result, we classified TPs as novel (in intergenic  
487 unannotated regions), nested or overlapping annotated features, and sense or antisense to a known  
488 feature.

489 *Differential expression analysis between conditions.* For each sample, read count was performed with  
490 featureCounts (63) from the Bioconductor Rsubread package with default parameters. Then, the count  
491 matrix was used to perform differential expression analysis in R (version 3.3.2) between worms fed  
492 with three different bacteria of each generation using DeSeq2 (64) version 1.4.5. The samples of  
493 animals feeding on pathogenic strains *P. aeruginosa* PAO1 and *S. enterica* serovar Typhimurium were  
494 compared with *E. coli* OP50. For each condition, the first and second generations were compared.

495 We conducted the previous analysis using a custom-made bash and R scripts, available at  
496 [https://github.com/mlegue/Gabaldon\\_2020](https://github.com/mlegue/Gabaldon_2020).

### 497 Prediction of *mir-243-3p* targets

498 We used the IntaRNA tool version 2.0 (22); <http://rna.informatik.uni-freiburg.de/IntaRNA/Input.jsp>.  
499 We adjusted parameters to force the longest possible seed with perfect complementarity. We started  
500 using the maximal admitted seed length (SeedBP=20) and run the analysis with all seed length above  
501 default (SeedBP=8) with no restrictions on seed energy. We also set the temperature to 20°C at which  
502 experiments were performed. We performed the interactions between *mir-243-3p* and the  
503 downregulated mRNA genes (polyA-genes) in our dataset. We also evaluate with the same parameters  
504 the interaction with Y47H10A.5, a validated *mir-243-3p* target.  
505

## 506 **Quantification of differential expression by RT-PCR**

507 *Total RNA Extraction:* 5 L4 (P0) worms were placed in 90 mm NGM plates seeded with *P. aeruginosa*  
508 PAO1. After 24 hours, the total population was collected with 1 mL of M9 and centrifuged at 394 x g  
509 for 2 minutes. The pellet was treated with hypochlorite solution (see above). All resulting F1 embryos  
510 were placed in new plate with *P. aeruginosa* PAO1 for 24 hours and collected as L2. Collection is done  
511 with M9 in an Eppendorf tube. Contents were centrifuged at 394 x g for 2 min. L2 pellet was washed 5  
512 times with M9 to eliminate the most bacteria from the sample. The pellet of synchronized worms (L2)  
513 was used for RNA extraction.

514 F2 animals were obtained from the same L4 P0 fed with *P. aeruginosa* and used to generate the F1 as  
515 explained above. F1 embryos were placed in a new 90 mm plate with 3 mL of *P. aeruginosa* PAO1.  
516 After 72 hours, the total population was collected with 1 mL of M9 and centrifuged at 394 x g for 2  
517 minutes. The pellet was treated with hypochlorite solution. F2 embryos were placed in a new plate with  
518 *P. aeruginosa* for 24 hours. The L2 worms were washed off the plate with M9 and centrifuged at 394 x  
519 g for 2 min. 5 washes with M9 were necessary to eliminate most bacteria from the sample. The pellet  
520 of synchronized worms (L2) was treated with 4 mm steel beads and 1 mL of RNA-Solv® Reagent  
521 (Omega Bio-Tek). The mix was vortexed for 5 minutes. RNA extraction was performed according to  
522 manufacturer specifications. Total RNA concentration was quantified with Tecan's NanoQuant Plate™.  
523 Each condition was performed in biological triplicates.

524 *cDNA Synthesis.* Using the extracted total RNAs, cDNA synthesis was performed with the MIR-X  
525 miRNA First Strand Synthesis from TAKARA following manufacturer's specifications.

526 *Real Time PCR (qPCR).* The cDNA samples (concentration 200 ng/μL) were used as a template to  
527 perform qPCR with the primers ©QIAGEN Ce\_miR-243\_1 miScript Primer Assay (MS00019481).  
528 The qPCR was performed with the MIR-X miRNA qRT-PCR TB Green Kit from TAKARA. To  
529 calculate the relative fold of expression of *mir-243-3p* between generations and genotypes we used  
530 delta-delta Ct calculations according to the Reference Unit Mass method (65). This method was based  
531 on the comparative use of the test sample against a calibrator (U6). Values less than 1 indicated the  
532 negative expression relation with respect to the control and a Ratio greater than 1 indicated the times  
533 above the sample with respect to the control.

## 534 **Quantification of *gfp* expression**

535 Expression levels of *pqm-1* and *crh-2* genes and the promoter of *mir-243* were quantified by using wild  
536 type animals expressing *gfp*. *gfp* was quantified in F1 and F2 L2 fed with *P. aeruginosa* PAO1 and *E.*  
537 *coli* OP50. Worms were taken individually with a mouth pipette and placed in a bed of agarose with  
538 levamisole (20 mM) to immobilize them. To quantify *gfp* expression, we photographed entire animals  
539 on a Nikon Eclipse Ni microscope in 40X objective at 1/320s (*mir-243::gfp*) and 1/10s (*pqm-1* and *crh-*  
540 *2*) exposure time, ISO 200/3200 speed (white light and Laser respectively) and focal length of 50 mm.  
541 For all markers, photos of entire animals were taken. GFP quantification was done considering the  
542 signal from the entire animal. Image analysis was performed using ImageJ. Prior to the analysis images  
543 are converted to 8-bit format and a threshold between 1 and 1.2.

544

## 545 **Statistical analysis**

546 Statistical analyzes were carried out using one- or two-way ANOVA with post-hoc tests. For the  
547 differential expression analysis, statistical significance was considered lower than p-value <0.05. All  
548 experiments were repeated at least three times using technical replicas in each.

549

## 550 Figure Legends

551 **Fig. 1.** Global analysis of differential mRNA gene expression of an intergenerational infection  
552 paradigm. **A-D.** Number of polyA-RNA coding (A, B) and non-coding (C, D) genes differentially  
553 expressed on *P. aeruginosa* PAO1 (A, C) and *S. enterica* serovar Typhimurium MST1 (B, D) in two  
554 generations. **E-F.** Type and abundance of non-coding RNAs on *P. aeruginosa* PAO1 and *S. enterica*  
555 MST1 in two generations. **G-H.** Venn diagram representation of shared and unique genes up (G) and  
556 down (H) regulated in each generation and on each pathogen.

557 **Fig. 2.** Coincidences in upregulated (A) and downregulated (B-C) genes of animals feeding on  
558 pathogens and those reported for *C. aquatica* (14), for one (A-B) and two (C) generations after change  
559 from *E. coli* OP50. Each figure includes GO enrichments for genes shared with *C. aquatica* and those  
560 shared between pathogens.

561 **Fig. 3.** Global analysis of differential small RNA gene expression of an intergenerational infection  
562 paradigm **A.** Representation of transcriptional unit designation. **B.** Genomic context of sRNA genes  
563 differentially expressed in pathogenic conditions. **C.** Type and abundance of sRNA genes differentially  
564 expressed on *P. aeruginosa* PAO1 and *S. enterica* MST1 in two generations **D-E.** Venn diagram  
565 representation of shared and unique genes over-expressed (D) and repressed (E) in each generation and  
566 on each pathogen. **F.** Number of sRNA genes differentially expressed on *P. aeruginosa* PAO1 and *S.*  
567 *enterica* MST1 in two generations.

568 **Fig. 4.** Expression of mature *mir-243* and role on pathogen induced diapause. **A.** Quantification of *mir-*  
569 *243-3p* expression in animals feeding on *P. aeruginosa* PAO1 for two generations. **B-D.** Growth (B),  
570 dauer formation on pathogens (C) and dauer formation by starvation (D) of *mir-243* mutant animals.

571 **Fig. 5.** Transcriptional factors required for *mir-243* expression and pathogen-induced diapause  
572 formation. **A.** Quantification of *mir-243* promoter expression by GFP in animals feeding on *P.*  
573 *aeruginosa* PAO1 compared to *E. coli* OP50 and representative photos. **B-C.** Quantification of  
574 expression of PQM-1 (B) and CRH-2 (C) by GFP expression on animals fed on pathogens. **D.**  
575 Quantification by RT-PCR of *mir-243-3p* on wild type and *daf-16*, *pqm-1* and *crh-2* mutant animals.  
576 **E-G.** Growth on *E. coli* OP50 (E), *P. aeruginosa* PAO1 (F) and dauer formation (G) in the second  
577 generation of animals. **H.** Dauer formation on starvation of wild type and mutants of transcription  
578 factors.

579 **Fig. S1.** Enrichment by GO term of upregulated (A, B) and downregulated (D, E) in animals feeding  
580 on *P. aeruginosa* PAO1 and *S. enterica* serovar Typhimurium MST1 in two generations. C, F  
581 Summary of shared GO terms in F1 and F2 in up (C) and downregulated (F) genes. MP, metabolic  
582 process; TA, transferase activity; HA, hydrolase activity; N, Nitrogen; C, Carbon; R, response; P,  
583 phosphate; UPR, Unfolded Protein Response.

584 **Table S1-2.** mRNA coding and non-coding genes differentially expressed in pathogenic conditions.  
585 Upregulated (1) and downregulated (2) genes expressed in F1 and F2 of animals feeding on *P.*  
586 *aeruginosa* PAO1 or *S. enterica* MST1.

587 **Table S3.** Pathogen specific and shared differentially expressed genes in each condition.

588 **Table S4-5.** Small RNAs differentially expressed in pathogenic conditions. Up and downregulated  
589 sRNAs in the F1 and F2 of animals feeding on *P. aeruginosa* PAO1 (4) or *S. enterica* MST1(5).

590 **Table S6.** Pathogen specific and shared differentially expressed genes in each condition. (14)  
591 upregulated and (15) downregulated genes.

592 **Table S7.** Putative targets of *mir-243* among genes downregulated in pathogenic conditions.

593 **Dataset 1.** Differential expression analysis of expressed mRNA genes in two generations of animals  
594 exposed to *P. aeruginosa* PAO1 and *S. enterica* MST1 by DeSeq and EdgeR.

595 **Dataset 2.** Differential expression analysis and genomic context of expressed sRNA genes in two  
596 generations of animals exposed to *P. aeruginosa* PAO1 and *S. enterica* MST1.

597

## 598 **Acknowledgments**

599 We are deeply grateful to Marcia Manterola in the University of Chile, who provided a laboratory in  
600 times of need. Without her help the finalization of this work would not have been possible. Ana Maria  
601 Pozo facilitated the timely acquisition of key reagents for this work. Some strains were provided by the  
602 CGC, which is funded by NIH Office of Research Infrastructure Programs (P40OD010440). This work  
603 funded by Millennium Scientific Initiative of the Chilean Ministry of Economy, Development, and  
604 Tourism (P029-022-F), Proyecto Apoyo Redes Formacion de Centros (REDES180138), ANID  
605 Programa Cooperación Internacional CYTED grant P918PTE 3, CONICYT-USA 0041 and Fondecyt  
606 1131038 to AC. The funders had no role in study design, data collection and interpretation, or the  
607 decision to submit the work for publication.

## 608 **Author contribution**

609 Conceptualization: MFP and AC

610 Methodology: ML, MFP, FG and AC

611 Investigation: CG, ML, MFP, LV, FG and AC

612 Writing-Original Draft: AC

613 Writing-Review and Editing: CG, ML, MFP and AC

614 Funding Acquisition: AC

615

## 616 **References**

- 617 1. **Cabreiro, F, Gems, D.** 2013. Worms need microbes too: microbiota, health and aging in  
618 *Caenorhabditis elegans*. EMBO Mol Med **5**:1300–1310.
- 619 2. **Schulenburg, H, Félix, MA.** 2017. The Natural Biotic Environment of *Caenorhabditis elegans*.  
620 Genetics **206**:55–86.
- 621 3. **Félix, MA, Ashe, A, Piffaretti, J, Wu, G, Nuez, I, Bêlicard, T, Jiang, Y, Zhao, G, Franz, CJ,**  
622 **Goldstein, LD, Sanroman, M, Miska, EA, Wang, D.** 2011. Natural and experimental infection  
623 of *Caenorhabditis* nematodes by novel viruses related to nodaviruses. PLoS Biol **9**:e1000586.
- 624 4. **Troemel, ER, Félix, MA, Whiteman, NK, Barrière, A, Ausubel, FM.** 2008. Microsporidia are  
625 natural intracellular parasites of the nematode *Caenorhabditis elegans*. PLoS Biol **6**:2736–2752.
- 626 5. **Gerbaba, TK, Green-Harrison, L, Buret, AG.** 2017. Modeling Host-Microbiome Interactions  
627 in *Caenorhabditis elegans*. J Nematol **49**:348–356.

- 628 6. **Zhang, Y, Lu, H, Bargmann, CI.** 2005. Pathogenic bacteria induce aversive olfactory learning  
629 in *Caenorhabditis elegans*. *Nature* **438**:179–184.
- 630 7. **Meisel, JD, Panda, O, Mahanti, P, Schroeder, FC, Kim, DH.** 2014. Chemosensation of  
631 bacterial secondary metabolites modulates neuroendocrine signaling and behavior of *C. elegans*.  
632 *Cell* **159**:267–280.
- 633 8. **Cezairliyan, B, Vinayavekhin, N, Grenfell-Lee, D, Yuen, GJ, Saghatelian, A, Ausubel, FM.**  
634 2013. Identification of *Pseudomonas aeruginosa* phenazines that kill *Caenorhabditis elegans*.  
635 *PLoS Pathog* **9**:e1003101.
- 636 9. **Gallagher, LA, Manoil, C.** 2001. *Pseudomonas aeruginosa* PAO1 kills *Caenorhabditis elegans*  
637 by cyanide poisoning. *J Bacteriol* **183**:6207–6214.
- 638 10. **Pradel, E, Zhang, Y, Pujol, N, Matsuyama, T, Bargmann, CI, Ewbank, JJ.** 2007. Detection  
639 and avoidance of a natural product from the pathogenic bacterium *Serratia marcescens* by  
640 *Caenorhabditis elegans*. *Proc Natl Acad Sci U S A* **104**:2295–2300.
- 641 11. **Cao, X, Kajino-Sakamoto, R, Doss, A, Aballay, A.** 2017. Distinct Roles of Sensory Neurons in  
642 Mediating Pathogen Avoidance and Neuropeptide-Dependent Immune Regulation. *Cell Rep*  
643 **21**:1442–1451.
- 644 12. **Tan, MW, Rahme, LG, Sternberg, JA, Tompkins, RG, Ausubel, FM.** 1999. *Pseudomonas*  
645 *aeruginosa* killing of *Caenorhabditis elegans* used to identify *P. aeruginosa* virulence factors.  
646 *Proc Natl Acad Sci U S A* **96**:2408–2413.
- 647 13. **Palominos, MF, Verdugo, L, Gabaldon, C, Pollak, B, Ortíz-Severín, J, Varas, MA, Chávez,  
648 FP, Calixto, A.** 2017. Transgenerational Diapause as an Avoidance Strategy against Bacterial  
649 Pathogens in *Caenorhabditis elegans*. *mBio* **8**
- 650 14. **MacNeil, LT, Watson, E, Arda, HE, Zhu, LJ, Walhout, AJ.** 2013. Diet-induced  
651 developmental acceleration independent of TOR and insulin in *C. elegans*. *Cell* **153**:240–252.
- 652 15. **Lee, RC, Feinbaum, RL, Ambros, V.** 1993. The *C. elegans* heterochronic gene *lin-4* encodes  
653 small RNAs with antisense complementarity to *lin-14*. *Cell* **75**:843–854.
- 654 16. **Reinhart, BJ, Slack, FJ, Basson, M, Pasquinelli, AE, Bettinger, JC, Rougvie, AE, Horvitz,  
655 HR, Ruvkun, G.** 2000. The 21-nucleotide *let-7* RNA regulates developmental timing in  
656 *Caenorhabditis elegans*. *Nature* **403**:901–906.
- 657 17. **Bartel, DP.** 2004. MicroRNAs: genomics, biogenesis, mechanism, and function. *Cell* **116**:281–  
658 297.
- 659 18. **Rechavi, O, Minevich, G, Hobert, O.** 2011. Transgenerational inheritance of an acquired small  
660 RNA-based antiviral response in *C. elegans*. *Cell* **147**:1248–1256.
- 661 19. **Rechavi, O, Hourí-Ze’evi, L, Anava, S, Goh, WSS, Kerk, SY, Hannon, GJ, Hobert, O.** 2014.  
662 Starvation-induced transgenerational inheritance of small RNAs in *C. elegans*. *Cell* **158**:277–287.
- 663 20. **Ren, Z, Ambros, VR.** 2015. *Caenorhabditis elegans* microRNAs of the *let-7* family act in innate  
664 immune response circuits and confer robust developmental timing against pathogen stress. *Proc*  
665 *Natl Acad Sci U S A* **112**:E2366–75.
- 666 21. **Kasuga, H, Fukuyama, M, Kitazawa, A, Kontani, K, Katada, T.** 2013. The microRNA miR-  
667 235 couples blast-cell quiescence to the nutritional state. *Nature* **497**:503–506.
- 668 22. **Mann, M, Wright, PR, Backofen, R.** 2017. IntaRNA 2.0: enhanced and customizable prediction  
669 of RNA-RNA interactions. *Nucleic Acids Res* **45**:W435–W439.
- 670 23. **Yang, W, Dierking, K, Rosenstiel, PC, Schulenburg, H.** 2016. GATA transcription factor as a  
671 likely key regulator of the *Caenorhabditis elegans* innate immune response against gut  
672 pathogens. *Zoology (Jena)* **119**:244–253.
- 673 24. **Blackwell, TK, Steinbaugh, MJ, Hourihan, JM, Ewald, CY, Isik, M.** 2015. SKN-1/Nrf, stress  
674 responses, and aging in *Caenorhabditis elegans*. *Free Radic Biol Med* **88**:290–301.



- 675 25. **Rohlfing, AK, Miteva, Y, Hannehalli, S, Lamitina, T.** 2010. Genetic and physiological  
676 activation of osmosensitive gene expression mimics transcriptional signatures of pathogen  
677 infection in *C. elegans*. *PLoS One* **5**:e9010.
- 678 26. **Martinez, NJ, Ow, MC, Barrasa, MI, Hammell, M, Sequerra, R, Doucette-Stamm, L, Roth,  
679 FP, Ambros, VR, Walhout, AJ.** 2008. A *C. elegans* genome-scale microRNA network contains  
680 composite feedback motifs with high flux capacity. *Genes Dev* **22**:2535–2549.
- 681 27. **Tepper, RG, Ashraf, J, Kaletsky, R, Kleemann, G, Murphy, CT, Bussemaker, HJ.** 2013.  
682 PQM-1 complements DAF-16 as a key transcriptional regulator of DAF-2-mediated development  
683 and longevity. *Cell* **154**:676–690.
- 684 28. **Lall, S, Grün, D, Krek, A, Chen, K, Wang, YL, Dewey, CN, Sood, P, Colombo, T, Bray, N,  
685 Macmenamin, P, Kao, HL, Gunsalus, KC, Pachter, L, Piano, F, Rajewsky, N.** 2006. A  
686 genome-wide map of conserved microRNA targets in *C. elegans*. *Curr Biol* **16**:460–471.
- 687 29. **Gottlieb, S, Ruvkun, G.** 1994. *daf-2*, *daf-16* and *daf-23*: genetically interacting genes controlling  
688 Dauer formation in *Caenorhabditis elegans*. *Genetics* **137**:107–120.
- 689 30. **Gómez-Orte, E, Cornes, E, Zheleva, A, Sáenz-Narciso, B, de Toro, M, Iñiguez, M, López, R,  
690 San-Juan, JF, Ezcurra, B, Sacristán, B, Sánchez-Blanco, A, Cerón, J, Cabello, J.** 2018.  
691 Effect of the diet type and temperature on the *C. elegans* transcriptome. *Oncotarget* **9**:9556–9571.
- 692 31. **Somasiri, P, Behm, CA, Adamski, M, Wen, J, Verma, NK.** 2020. Transcriptional response of  
693 *Caenorhabditis elegans* when exposed to *Shigella flexneri*. *Genomics* **112**:774–781.
- 694 32. **Irazaqui, JE, Troemel, ER, Feinbaum, RL, Luhachack, LG, Cezairliyan, BO, Ausubel, FM.**  
695 2010. Distinct pathogenesis and host responses during infection of *C. elegans* by *P. aeruginosa*  
696 and *S. aureus*. *PLoS Pathog* **6**:e1000982.
- 697 33. **Shivers, RP, Youngman, MJ, Kim, DH.** 2008. Transcriptional responses to pathogens in  
698 *Caenorhabditis elegans*. *Curr Opin Microbiol* **11**:251–256.
- 699 34. **Daxinger, L, Whitelaw, E.** 2010. Transgenerational epigenetic inheritance: more questions than  
700 answers. *Genome Res* **20**:1623–1628.
- 701 35. **Jaenisch, R, Bird, A.** 2003. Epigenetic regulation of gene expression: how the genome integrates  
702 intrinsic and environmental signals. *Nat Genet* **33 Suppl**:245–254.
- 703 36. **Heard, E, Martienssen, RA.** 2014. Transgenerational epigenetic inheritance: myths and  
704 mechanisms. *Cell* **157**:95–109.
- 705 37. **Penkov, S, Mitroulis, I, Hajishengallis, G, Chavakis, T.** 2019. Immunometabolic Crosstalk: An  
706 Ancestral Principle of Trained Immunity. *Trends Immunol* **40**:1–11.
- 707 38. **Angeles-Albores, D, Lee, RYN, Chan, J, Sternberg, PW.** 2018. Two new functions in the  
708 WormBase enrichment suite. *microPublication Biology*
- 709 39. **Barrière, A, Félix, MA.** 2005. High local genetic diversity and low outcrossing rate in  
710 *Caenorhabditis elegans* natural populations. *Curr Biol* **15**:1176–1184.
- 711 40. **Belicard, T, Jareosettasin, P, Sarkies, P.** 2018. The piRNA pathway responds to environmental  
712 signals to establish intergenerational adaptation to stress. *BMC biology* **16**:1–14.
- 713 41. **Taylor, PK, Van Kessel, ATM, Colavita, A, Hancock, REW, Mah, TF.** 2017. A novel small  
714 RNA is important for biofilm formation and pathogenicity in *Pseudomonas aeruginosa*. *PLoS*  
715 *One* **12**:e0182582.
- 716 42. **Sun, L, Zhi, L, Shakoob, S, Liao, K, Wang, D.** 2016. microRNAs Involved in the Control of  
717 Innate Immunity in *Candida* Infected *Caenorhabditis elegans*. *Sci Rep* **6**:36036.
- 718 43. **Zhi, L, Yu, Y, Li, X, Wang, D, Wang, D.** 2017. Molecular Control of Innate Immune Response  
719 to *Pseudomonas aeruginosa* Infection by Intestinal *let-7* in *Caenorhabditis elegans*. *PLoS Pathog*  
720 **13**:e1006152.
- 721 44. **Ma, H, Marti-Gutierrez, N, Park, SW, Wu, J, Lee, Y, Suzuki, K, Koski, A, Ji, D, Hayama,  
722 T, Ahmed, R, Darby, H, Van Dyken, C, Li, Y, Kang, E, Park, AR, Kim, D, Kim, ST, Gong,  
723 J, Gu, Y, Xu, X, Battaglia, D, Krieg, SA, Lee, DM, Wu, DH, Wolf, DP, Heitner, SB,**

- 724 **Belmonte, JCI, Amato, P, Kim, JS, Kaul, S, Mitalipov, S.** 2017. Correction of a pathogenic  
725 gene mutation in human embryos. *Nature* **548**:413–419.
- 726 45. **Ambros, V, Ruvkun, G.** 2018. Recent Molecular Genetic Explorations of *Caenorhabditis*  
727 *elegans* MicroRNAs. *Genetics* **209**:651–673.
- 728 46. **Kudlow, BA, Zhang, L, Han, M.** 2012. Systematic analysis of tissue-restricted miRISCs reveals  
729 a broad role for microRNAs in suppressing basal activity of the *C. elegans* pathogen response.  
730 *Molecular cell* **46**:530–541.
- 731 47. **Corrêa, RL, Steiner, FA, Berezikov, E, Ketting, RF.** 2010. MicroRNA-directed siRNA  
732 biogenesis in *Caenorhabditis elegans*. *PLoS Genet* **6**:e1000903.
- 733 48. **Troemel, ER, Chu, SW, Reinke, V, Lee, SS, Ausubel, FM, Kim, DH.** 2006. p38 MAPK  
734 regulates expression of immune response genes and contributes to longevity in *C. elegans*. *PLoS*  
735 *Genet* **2**:e183.
- 736 49. **Singh, V, Aballay, A.** 2009. Regulation of DAF-16-mediated Innate Immunity in *Caenorhabditis*  
737 *elegans*. *J Biol Chem* **284**:35580–35587.
- 738 50. **Aballay, A, Ausubel, FM.** 2002. *Caenorhabditis elegans* as a host for the study of host-pathogen  
739 interactions. *Curr Opin Microbiol* **5**:97–101.
- 740 51. **Brenner, S.** 1974. The genetics of *Caenorhabditis elegans*. *Genetics* **77**:71–94.
- 741 52. **Cassada, RC, Russell, RL.** 1975. The dauerlarva, a post-embryonic developmental variant of the  
742 nematode *Caenorhabditis elegans*. *Dev Biol* **46**:326–342.
- 743 53. **Bolger, AM, Lohse, M, Usadel, B.** 2014. Trimmomatic: a flexible trimmer for Illumina  
744 sequence data. *Bioinformatics* **30**:2114–2120.
- 745 54. **Trapnell, C, Pachter, L, Salzberg, SL.** 2009. TopHat: discovering splice junctions with RNA-  
746 Seq. *Bioinformatics* **25**:1105–1111.
- 747 55. **Anders, S, Pyl, PT, Huber, W.** 2015. HTSeq--a Python framework to work with high-  
748 throughput sequencing data. *Bioinformatics* **31**:166–169.
- 749 56. **Robinson, MD, McCarthy, DJ, Smyth, GK.** 2010. edgeR: a Bioconductor package for  
750 differential expression analysis of digital gene expression data. *Bioinformatics* **26**:139–140.
- 751 57. **Anders, S, Huber, W.** 2010. Differential expression analysis for sequence count data. *Genome*  
752 *Biol* **11**:R106.
- 753 58. **Angeles-Albores, D, N Lee, RY, Chan, J, Sternberg, PW.** 2016. Tissue enrichment analysis for  
754 *C. elegans* genomics. *BMC Bioinformatics* **17**:366.
- 755 59. **Martin, M.** 2011. Cutadapt removes adapter sequences from high-throughput sequencing reads.  
756 *EMBnet. journal* **17**:10–12.
- 757 60. **Langmead, B, Salzberg, SL.** 2012. Fast gapped-read alignment with Bowtie 2. *Nat Methods*  
758 **9**:357–359.
- 759 61. **Li, H, Handsaker, B, Wysoker, A, Fennell, T, Ruan, J, Homer, N, Marth, G, Abecasis, G,  
760 Durbin, R, 1000, GPDPS.** 2009. The Sequence Alignment/Map format and SAMtools.  
761 *Bioinformatics* **25**:2078–2079.
- 762 62. **Quinlan, AR, Hall, IM.** 2010. BEDTools: a flexible suite of utilities for comparing genomic  
763 features. *Bioinformatics* **26**:841–842.
- 764 63. **Liao, Y, Smyth, GK, Shi, W.** 2014. featureCounts: an efficient general-purpose program for  
765 assigning sequence reads to genomic features. *Bioinformatics* **30**:923–930.
- 766 64. **Love, MI, Huber, W, Anders, S.** 2014. Moderated estimation of fold change and dispersion for  
767 RNA-seq data with DESeq2. *Genome Biol* **15**:550.
- 768 65. **Guénin, S, Mauriat, M, Pelloux, J, Van Wuytswinkel, O, Bellini, C, Gutierrez, L.** 2009.  
769 Normalization of qRT-PCR data: the necessity of adopting a systematic, experimental conditions-  
770 specific, validation of references. *J Exp Bot* **60**:487–493.
- 771

# Figure 1

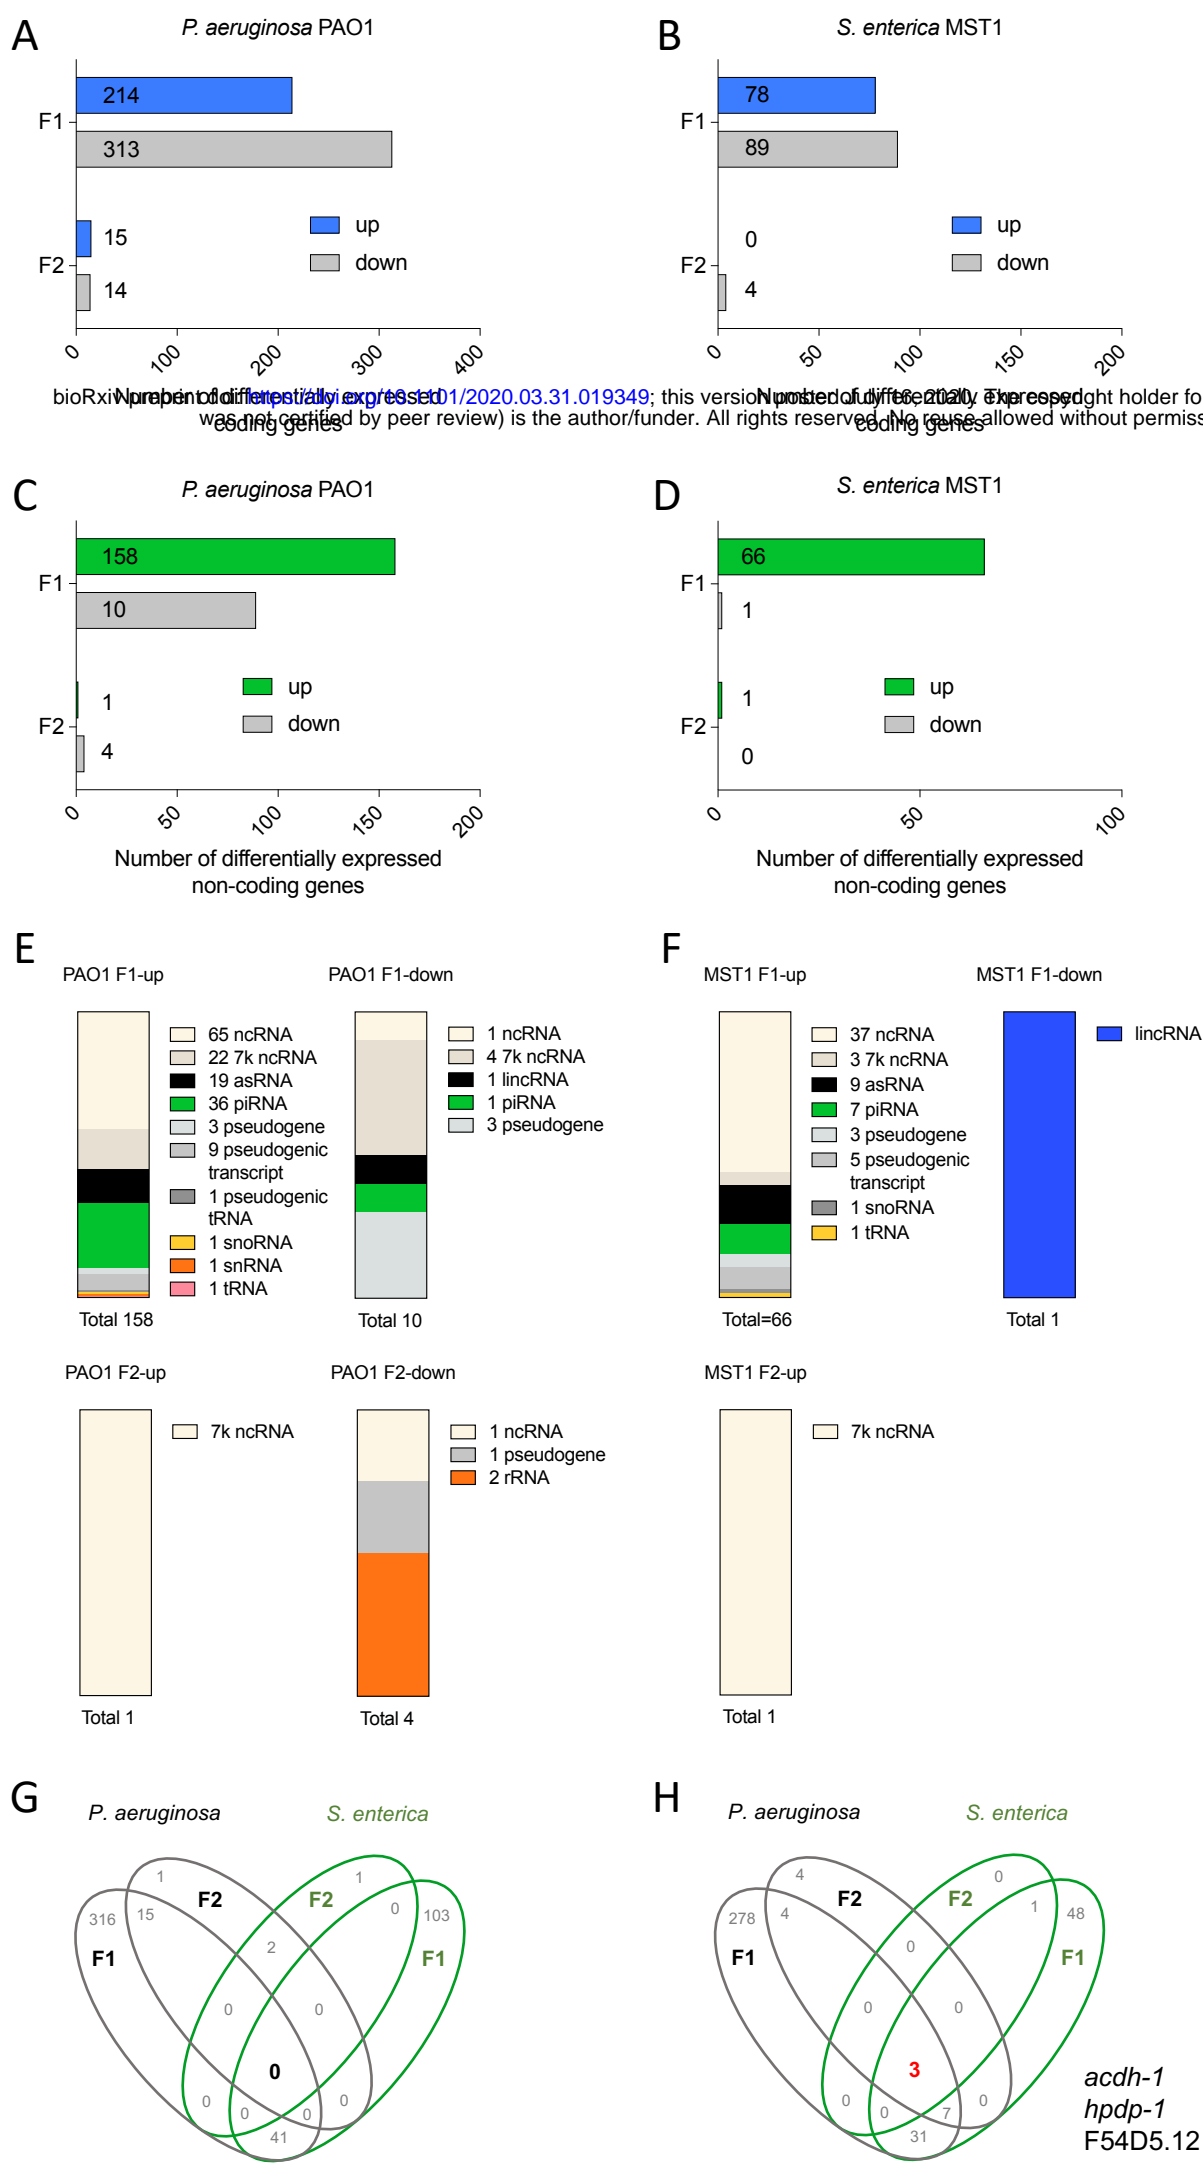

**Fig. 1.** Global analysis of differential mRNA gene expression of an intergenerational infection paradigm. **A-D.** Number of polyA-RNA coding (A, B) and non-coding (C, D) genes differentially expressed on *P. aeruginosa* PAO1 (A, C) and *S. enterica* serovar Typhimurium MST1 (B, D) in two generations. **E-F.** Type and abundance of non-coding RNAs on *P. aeruginosa* PAO1 and *S. enterica* MST1 in two generations. **G-H.** Venn diagram representation of shared and unique genes up (G) and down (H) regulated in each generation and on each pathogen

## Figure 2

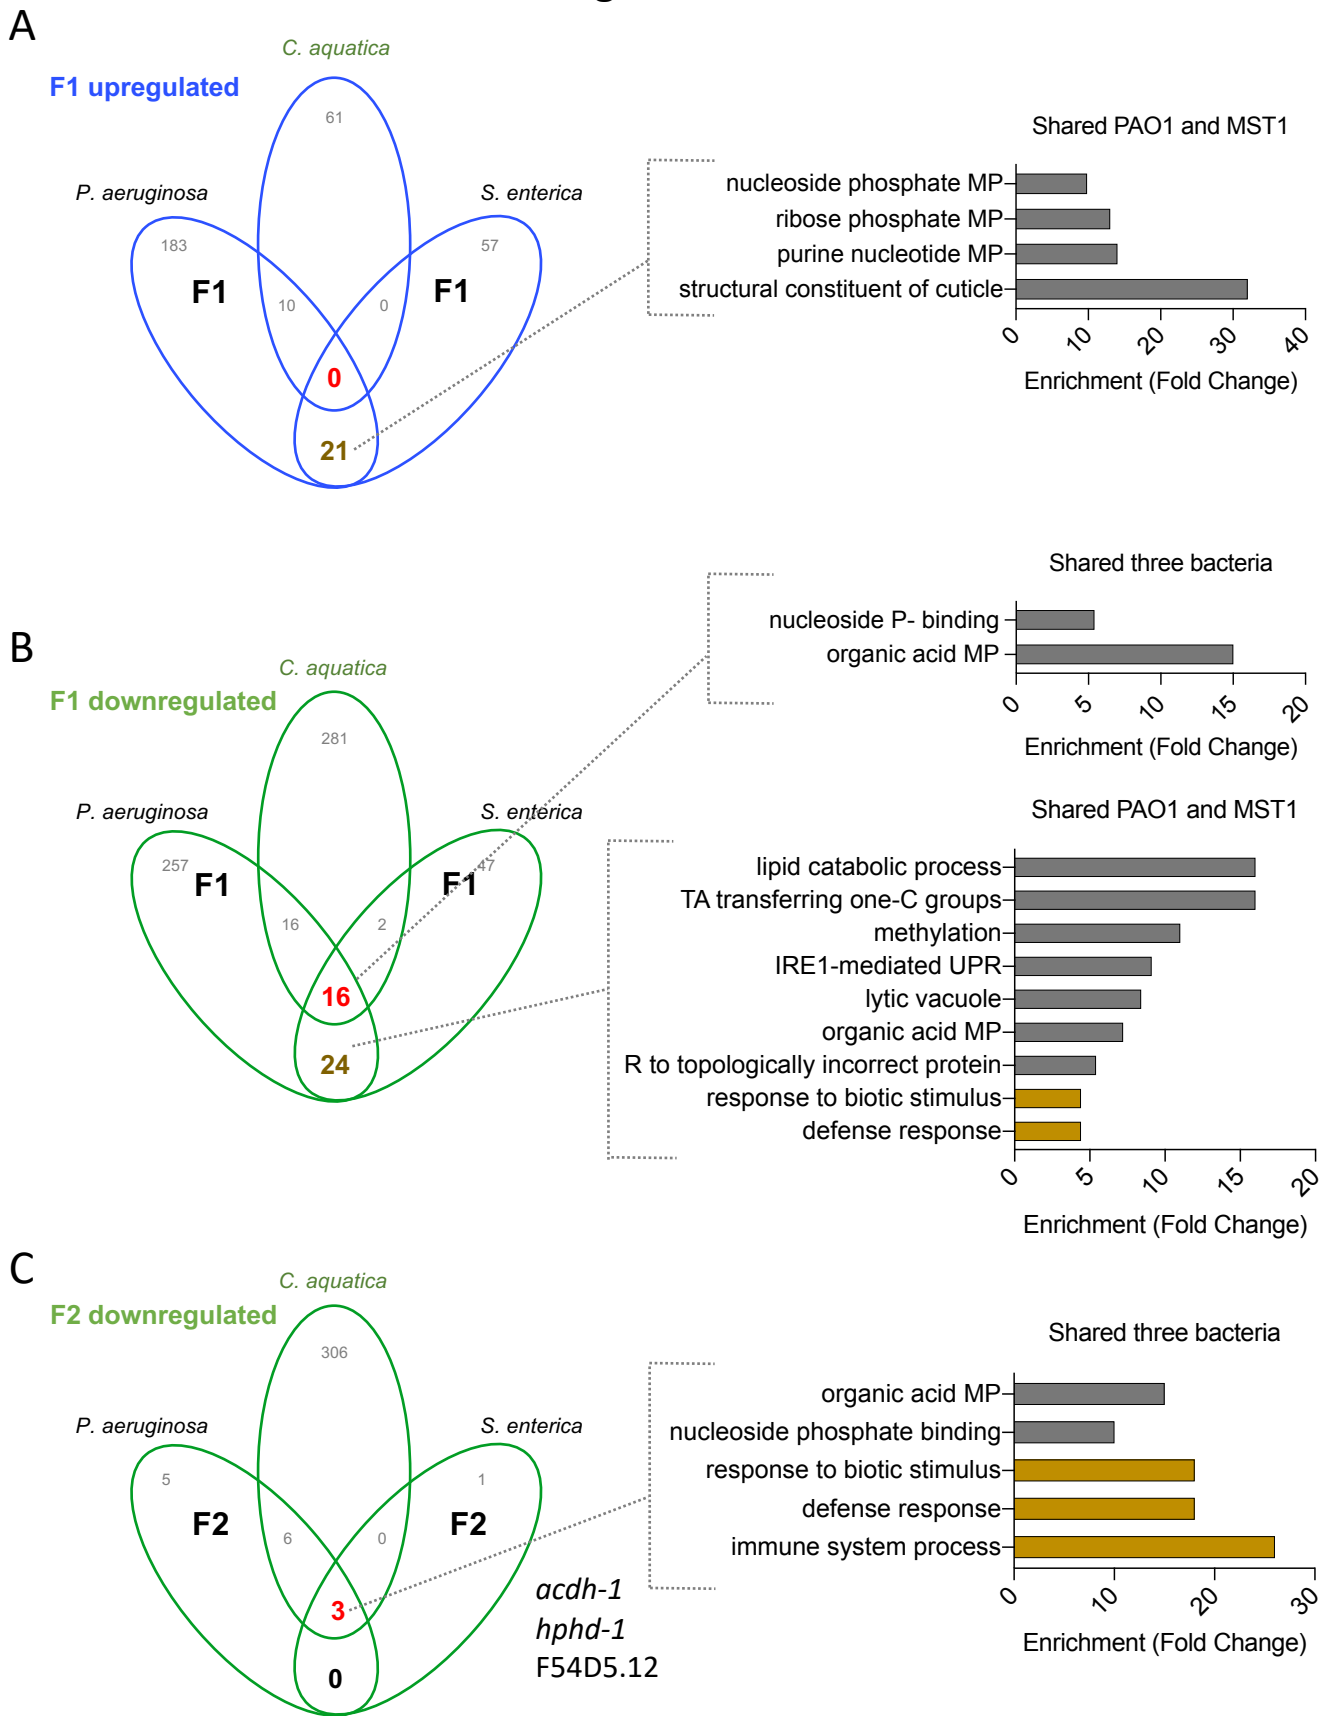

**Fig. 2.** Coincidences in upregulated (A) and downregulated (B-C) genes of animals feeding on pathogens and those reported for *C. aquatica* (ref), for one (A-B) and two (C) generations after change from *E. coli* OP50. Each figure includes GO enrichments for genes shared with *C. aquatica* and those shared between pathogens.

Figure 3

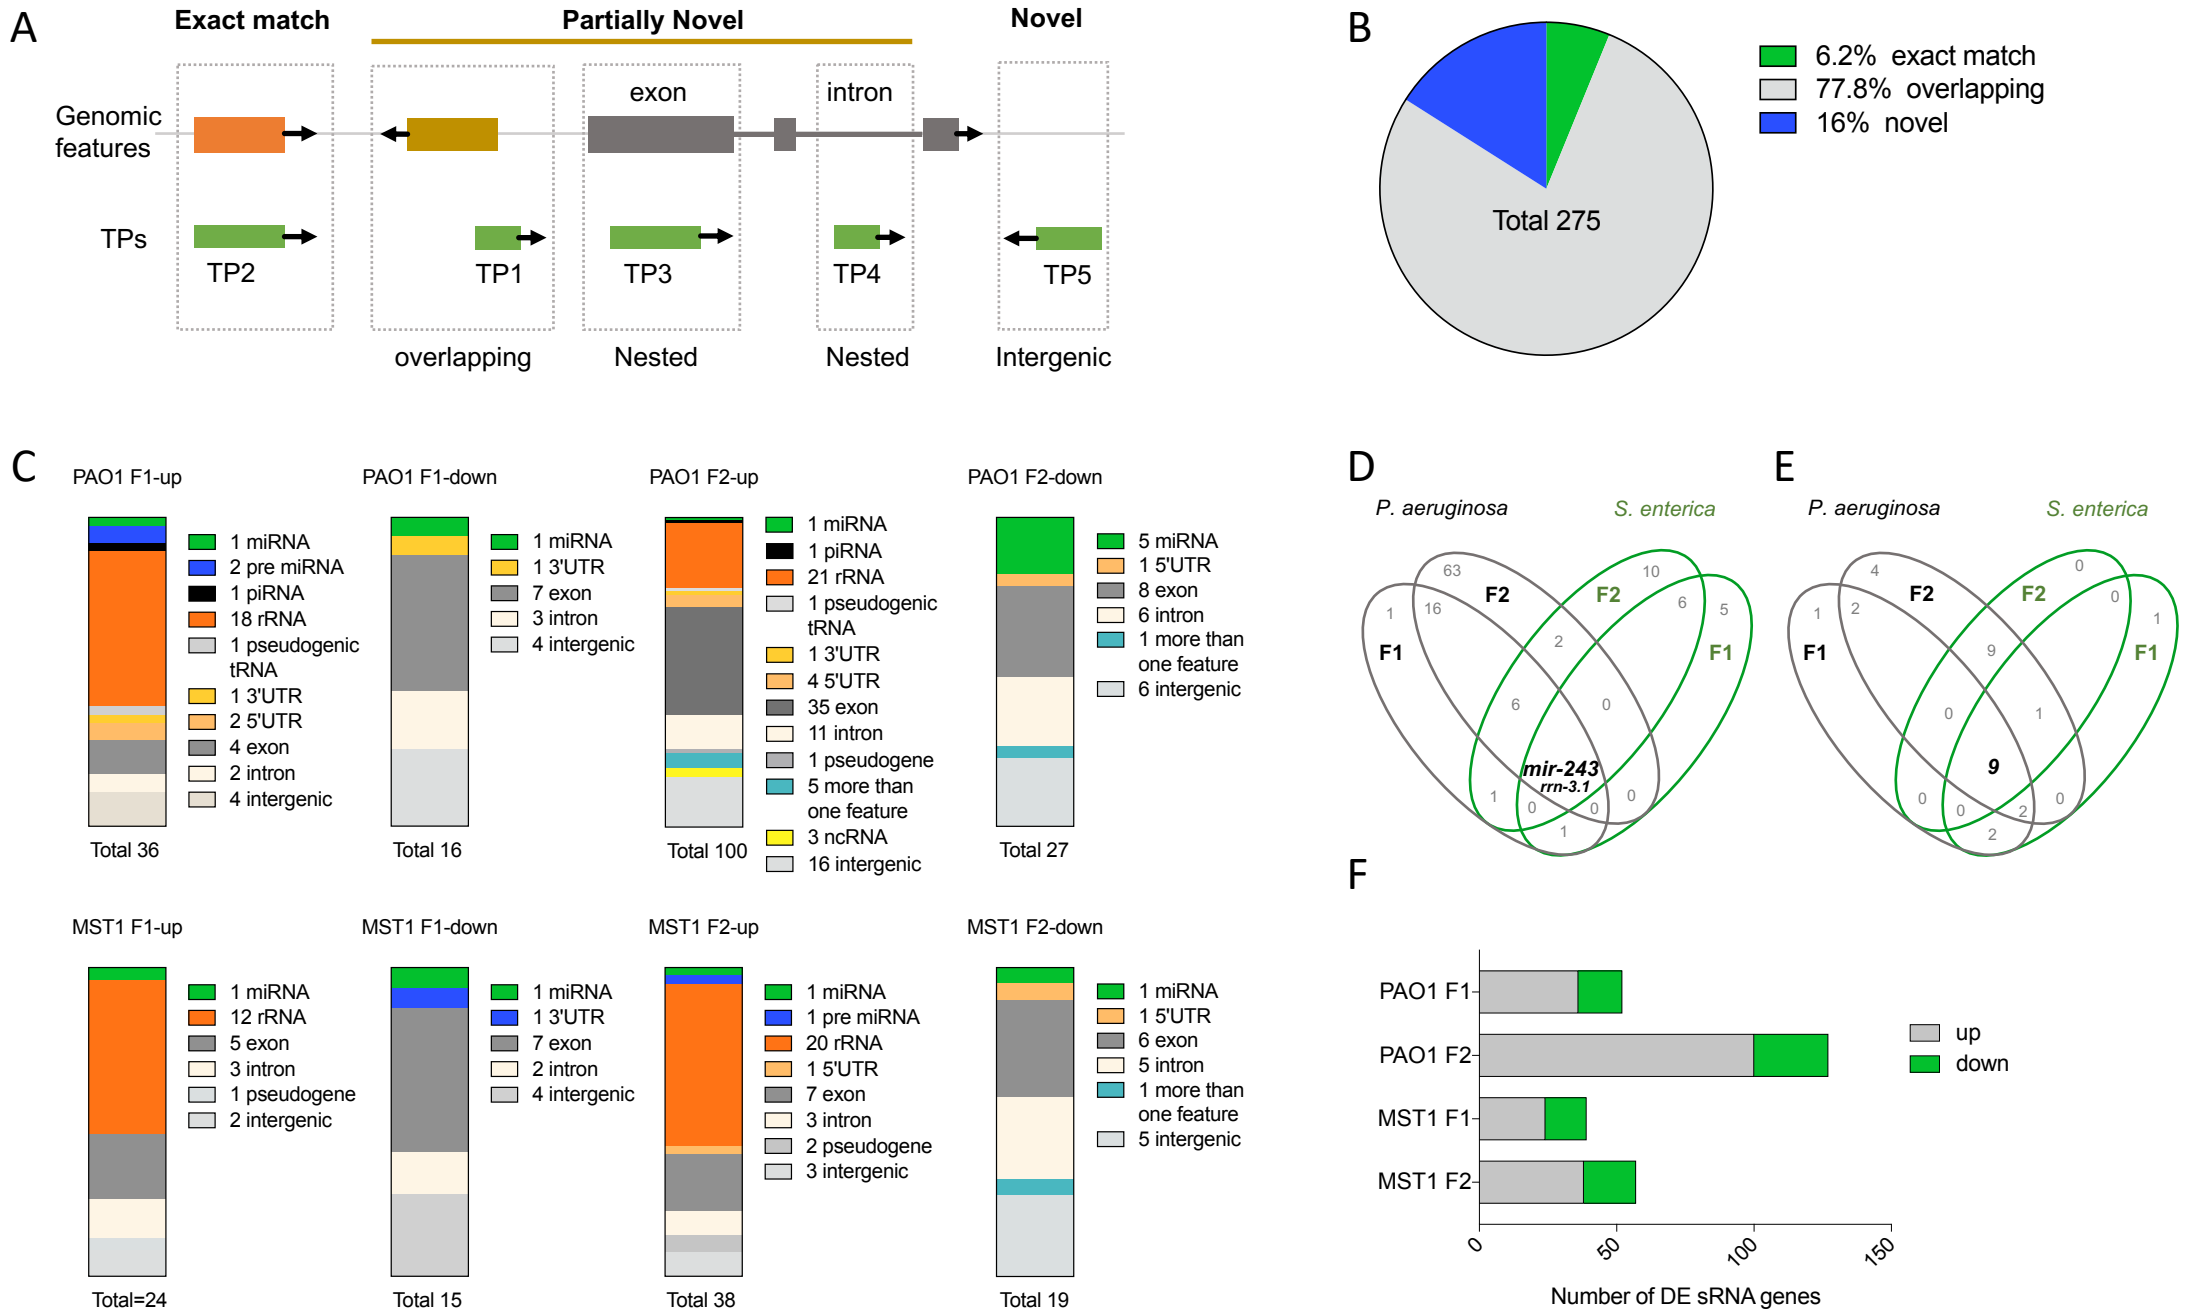

**Fig. 3.** Global analysis of differential small RNA gene expression of an intergenerational infection paradigm **A.** Representation of transcriptional unit designation. **B.** Genomic context of sRNA genes differentially expressed in pathogenic conditions. **C.** Type and abundance of sRNA genes differentially expressed on *P. aeruginosa* PAO1 and *S. Typhimurium* MST1 in two generations **D-E.** Venn diagram representation of shared and unique genes over-expressed (**D**) and repressed (**E**) in each generation and on each pathogen. **F.** Number of sRNA genes differentially expressed on *P. aeruginosa* PAO1 and *S. Typhimurium* MST1 in two generations.

Figure 4

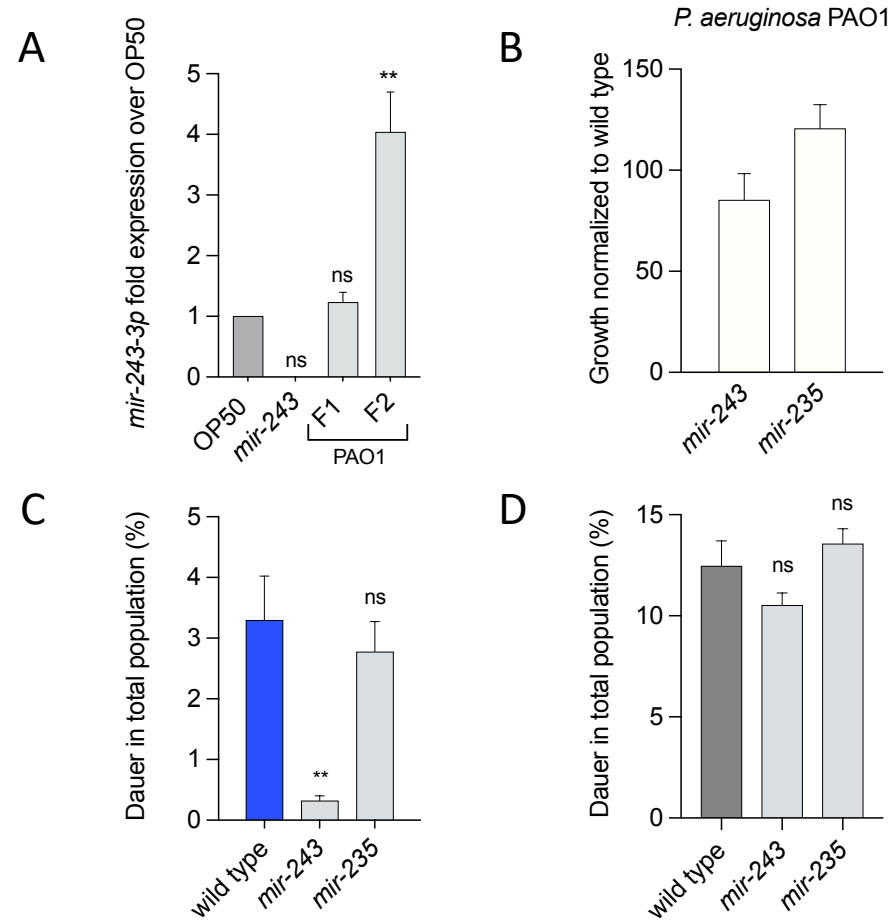

**Fig. 4.** Expression of mature *mir-243* and role on pathogen induced diapause. **A.** Quantification of *mir-243-3p* expression in animals feeding on *P. aeruginosa* PAO1 for two generations. **B-D** Growth (B), dauer formation on pathogens (C) and dauer formation by starvation (D) of *mir-243* mutants.

Figure 5

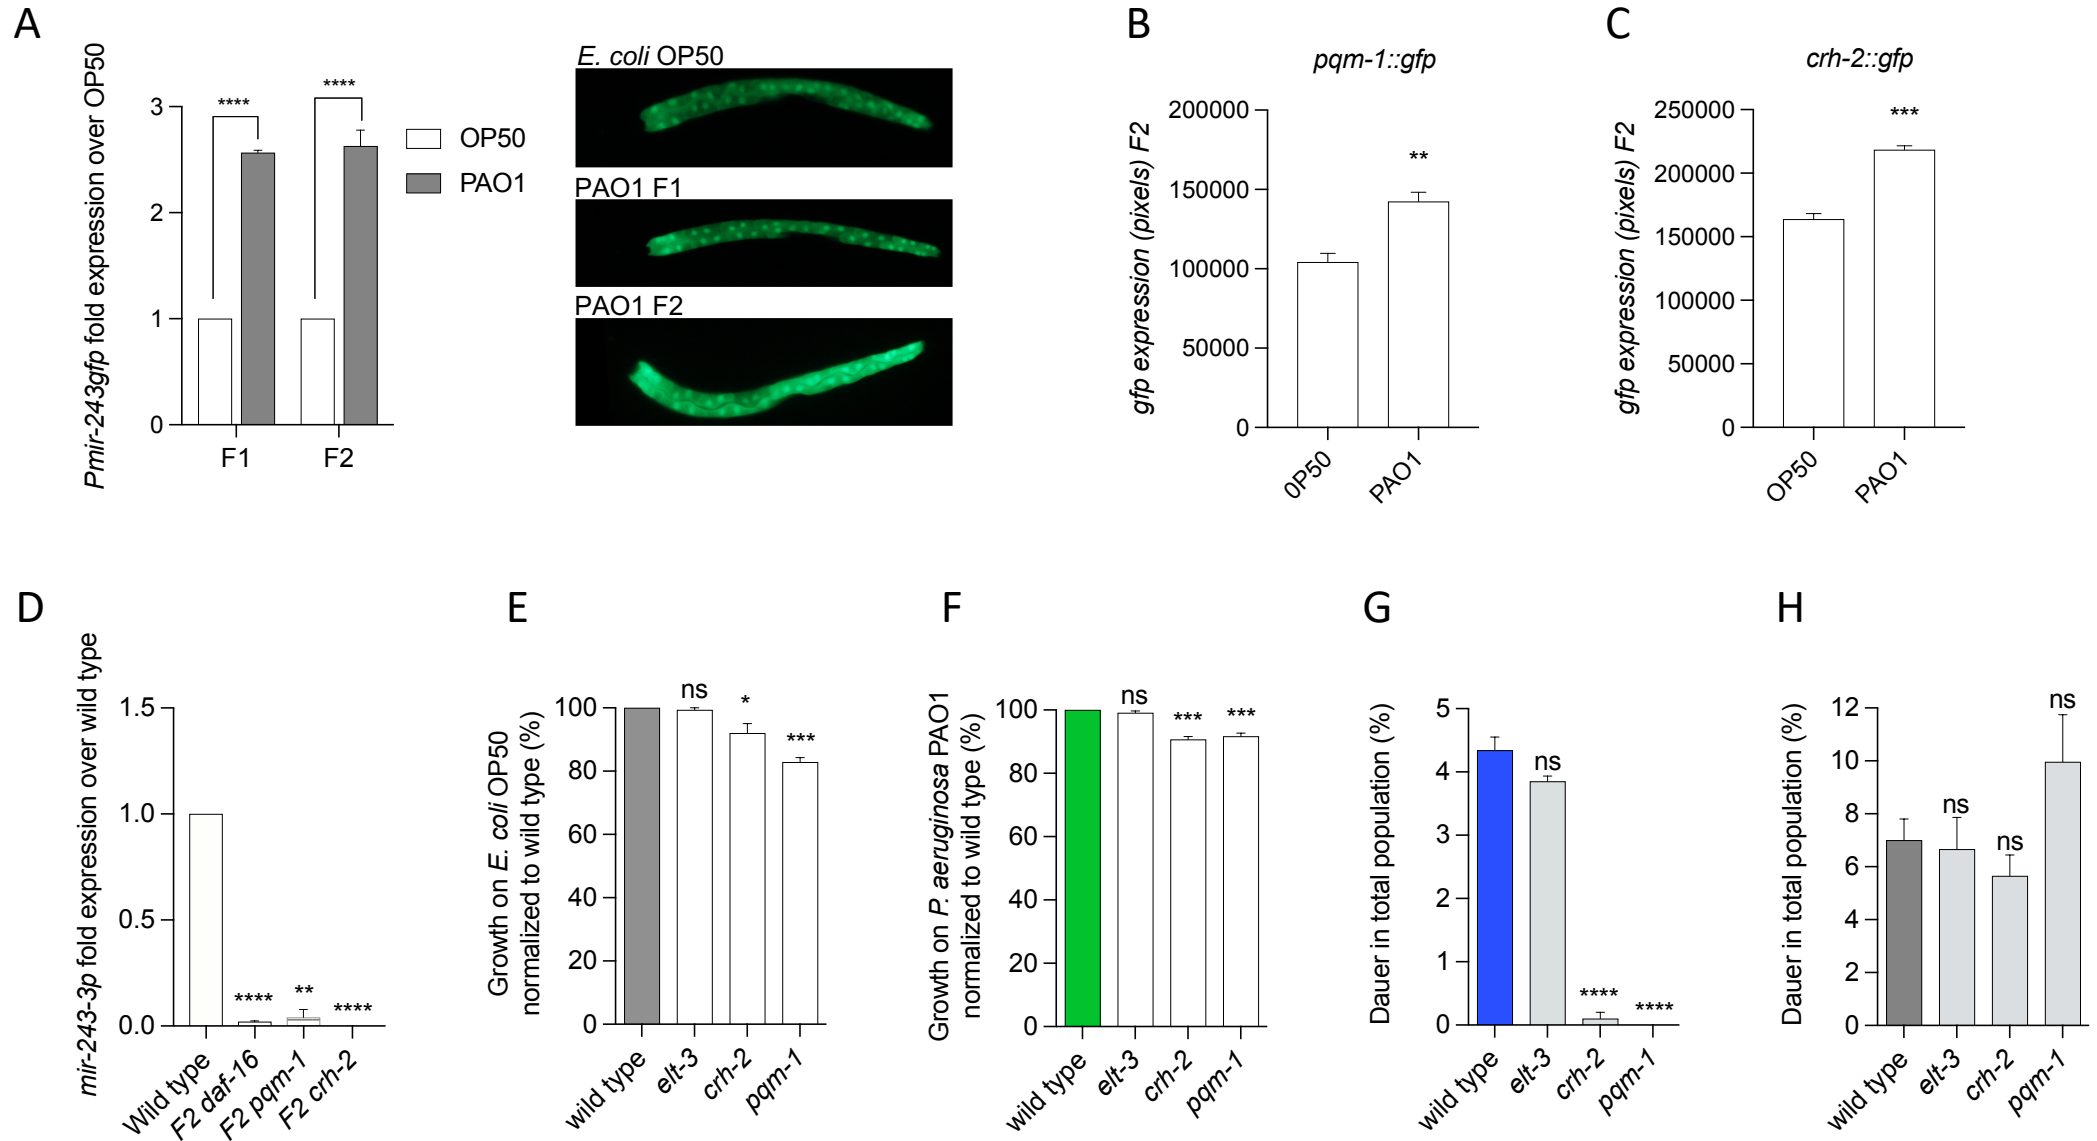

**Fig. 5.** Transcriptional factors required for *mir-243* expression and pathogen-induced diapause formation. **A.** Quantification of *mir-243* promoter expression by GFP in animals feeding on *P. aeruginosa* PAO1 compared to *E. coli* OP50 and representative photos. **B-C.** Quantification of expression of PQM-1 (B) and CRH-2 (C) by GFP expression on animals fed on pathogens. **D.** Quantification by RT-PCR of *mir-243-3p* on wild type and *daf-16*, *pqm-1* and *crh-2* mutant animals. **E-G.** Growth on *E. coli* OP50 (E), *P. aeruginosa* PAO1 (F) and dauer formation (G) in the second generation of animals. **H.** Dauer formation on starvation of wild type and mutants of transcription factors.
